# Supplementary material for: Controlled O2reduction at a mixed-valent (II,I) Cu2S core
Source: Royal Society of Chemistry journal article supplement (doi:10.1039/d0cc03987j), 2020-01-01
Supplement: d0cc03987j1.pdf [file d0cc03987j1.pdf]

## Supporting information for

### Controlled O<sub>2</sub> reduction at a mixed-valent (II,I) Cu<sub>2</sub>S core.

Jordan Mangué,<sup>a</sup> Clément Gondre,<sup>a</sup> Jacques Pécaut,<sup>b</sup> Carole Duboc,<sup>c</sup> Stéphane Ménage<sup>a</sup> and Stéphane Torelli\*<sup>a</sup>

<sup>a</sup> Univ. Grenoble Alpes, CNRS, CEA, IRIG, Laboratoire de Chimie et Biologie des Métaux, 17 rue des Martyrs, 38054 Grenoble Cedex 9, France.

<sup>b</sup> Univ. Grenoble Alpes, CEA, CNRS, IRIG, SYMMES, UMR 5819 Equipe Chimie Interface Biologie pour l'Environnement, la Santé et la Toxicologie, 38054 Grenoble Cedex 9, France

<sup>c</sup> Univ. Grenoble Alpes, Département de Chimie Moléculaire, 301 rue de la chimie, 38054 Grenoble Cedex 9, France.

Correspondence should be addressed to [stephane.torelli@cea.fr](mailto:stephane.torelli@cea.fr)

## Table of Contents

### Experimental Section

#### Catalytic Experiments and H<sub>2</sub>O<sub>2</sub> Detection.

**Figure S1.** UV-vis spectra of Fc<sup>+</sup>, Me<sub>2</sub>Fc<sup>+</sup>, Me<sub>8</sub>Fc<sup>+</sup> and Me<sub>10</sub>Fc<sup>+</sup> in MeCN at 298 K.

**Figure S2.** Typical UV-vis changes for the catalytic ORR by **1** in MeCN with Fc (100 molar eq.), Me<sub>2</sub>Fc (100 molar eq.), Me<sub>8</sub>Fc (40 molar eq.) and Me<sub>10</sub>Fc (40 molar eq.).

**Figure S3.** Kinetic profiles (Abs<sub>max</sub><sup>614nm</sup>) for the catalytic ORR by **1** with LutHBF<sub>4</sub> and Fc (10 and 100 molar eq.) in air-saturated MeCN.

**Figure S4.** Kinetic profiles (Abs<sub>max</sub><sup>650nm</sup>) for the catalytic ORR by **1** with LutHBF<sub>4</sub> and Me<sub>2</sub>Fc (10 and 100 molar eq.) in air-saturated MeCN.

**Figure S5.** Kinetic profiles (Abs<sub>max</sub><sup>750nm</sup>) for the catalytic ORR by **1** with LutHBF<sub>4</sub> and Me<sub>8</sub>Fc (10, 20, 40 and 60 molar eq.) in air-saturated MeCN.

**Figure S6.** Kinetic profiles ( $Abs_{max}^{750nm}$ ) for the catalytic ORR by **1** with  $LutHBF_4$  and  $Me_8Fc$  (80 and 100 molar eq.) in air-saturated MeCN.

**Figure S7.** Kinetic profiles ( $Abs_{max}^{778nm}$ ) for the catalytic ORR by **1** with  $LutHBF_4$  and  $Me_{10}Fc$  (10, 20, 40 and 60 molar eq.) in air-saturated MeCN.

**Figure S8.** Kinetic profiles ( $Abs_{max}^{778nm}$ ) for the catalytic ORR by **1** with  $LutHBF_4$  and  $Me_{10}Fc$  (80 and 100 molar eq.) in air-saturated MeCN.

**Figure S9.**  $H_2O_2$  calibration curve using the  $TiO$ -tpyp reagent and corresponding UV-vis traces

**Figure S10.** Control experiments.

**Figure S11.** Plot of the *pseudo*-first-order rate constants ( $k_{obs}$ ) versus  $[Me_{8-10}Fc]$  for the ORR catalysed by **1** in the presence of 400 molar eq.  $LutHBF_4$  in air-saturated MeCN at 298 K.

**Figure S12.**  $Me_8Fc^+$  accumulation (by monitoring the absorbance at 750 nm) upon successive runs under  $H_2O_2$  production conditions;  $[1] = 0.05$  mM,  $1/Me_8Fc/LutHBF_4$  at 1/10/400, air-saturated MeCN, 298 K.

**Figure S13.** Changes in the UV-vis/NIR spectrum of **1** (0.75 mM) in the presence of proton and electron sources under inert atmosphere.

**Figure S14.** Changes in the X-band (9.39 GHz) EPR spectrum of **1** upon subsequent reaction with  $LutHBF_4$  (400 molar eq.) and  $Me_8Fc$  (10 molar eq.) or a mixture of both reagents in MeCN under inert atmosphere at 42 K.

**Figure S15.** Electrospray ionization mass spectrum of *in situ* generated  $1_{red}^H$  from the reaction of **1** with  $LutHBF_4$  and  $Me_8Fc$  in MeCN.

**Figure S16.** X-ray crystal structure of  $1_{ox}$ .

**Figure S17.** UV-vis/NIR spectra of **1** before and after exposure to air ( $1_{ox}$ ) in MeCN at 298 K.

**Figure S18.** Changes in the X-band (9.39 GHz) EPR spectrum of **1** before and after exposure to air ( $1_{ox}$ ) in MeCN at 42 K.

**Figure S19.** Electrospray ionization mass spectrum of  $1_{ox}$  generated from air oxidation of a MeCN solution of **1**.

**Figure S20.** Kinetic profiles ( $Abs_{\max}^{750\text{nm}}$ ) resulting from the reaction of  $\mathbf{1}_{\text{ox}}$  with an air-saturated MeCN mixture of  $\text{Me}_8\text{Fc}$  and  $\text{LutHBF}_4$  (1/10/400).

**Figure S21.** Changes in the UV-vis spectrum of  $\mathbf{1}_{\text{ox}}$  (0.5 mM) consecutive to the addition of  $\text{LutHBF}_4$ ,  $\text{Me}_8\text{Fc}$  or a combination under inert atmosphere in MeCN at 298 K.

**Figure S22.** Possible routes for the formation of  $\mathbf{1}_{\text{red}}^{\text{H}}$  starting from  $\mathbf{1}$ .

**Figure S23.** Electrospray ionization mass spectrum of the final reaction mixture obtained upon air exposure of a combination of  $\mathbf{1}$  +  $\text{LutHBF}_4$  and  $\text{Me}_8\text{Fc}$  in MeCN.

**Table S1.** Calculated maximum absorbance values for the tested experimental conditions.<sup>(a)</sup>

**Table S2.**  $k_{\text{obs}}$  ( $\text{s}^{-1}$ ) values obtained from mono- or bi-exponential fits of the kinetics traces corresponding to the accumulation of ferrocenium derivatives at the appropriate  $\lambda_{\text{max}}$ .

**Table S3.** Crystal data and structure refinement for  $\mathbf{1}_{\text{ox}}$ .

**Table S4.** Bond length [ $\text{\AA}$ ] and angles [deg] for  $\mathbf{1}_{\text{ox}}$ .

## Experimental section

General. **All chemicals** are from Acros Organics, Merck, or Lancaster. Acroseal<sup>®</sup> purity solvents were used for air-sensitive experiments. Complex  $\mathbf{1}$  was prepared according to our reported procedure.<sup>[1]</sup>  $\text{LutHBF}_4$ ,  $\text{Me}_8\text{Fc}$ ,  $\text{Me}_2\text{Fc}^+$ ,  $\text{Me}_8\text{Fc}^+$  and  $\text{Me}_{10}\text{Fc}^+$  were prepared according to reported procedures.<sup>[2]</sup> Air-sensitive materials were manipulated in an Argon flushed glove box ( $\text{O}_2$  and  $\text{H}_2\text{O} < 2$  ppm). **Mass spectrometry spectra** were recorded with a Bruker Daltonics Esquire 3000 Plus (ESI-MS) device. **X-ray crystallography** data were acquired at 150 K using an Oxford-diffraction XCalibur S diffractometer with graphite monochromated  $\text{MoK}\alpha$  radiation ( $\lambda = 0.71073 \text{ \AA}$ ). Molecular structure was solved by direct methods and refined on  $F^2$  by full matrix least squares techniques using SHELX TL package. All non-hydrogen atoms were refined anisotropically, and hydrogen atoms were placed in ideal positions and refined as riding atoms with individual isotropic displacement parameters. **X-band EPR** spectra were obtained on a Bruker EMX spectrometer equipped with an Oxford ESR 910 cryostat for low temperature studies. The microwave frequency was calibrated with a frequency counter and the magnetic field with an NMR gaussmeter. Spectra were analysed with the WIN-EPR software. When required, spin quantification was done using a  $\text{Cu}^{\text{II}}$  standard as reference ( $[\text{Cu}^{\text{II}}] = 0.95 \text{ mM}$ ) and the following equation:

$$C(u) = \frac{\ln(u) * 0.00095}{\ln(st)}$$

Where:

$C(u)$  is the  $S=1/2$  concentration to be determined in the sample,

$\ln(u)$  is the normalized integral (DI/N) of the sample,

$\ln(st)$  is the normalized integral (DI/N) of the  $\text{Cu}^{\text{II}}$  standard.

**UV-vis/NIR** spectra were recorded on a Perkin Elmer Lambda 1050 Spectrophotometer operating at room temperature equipped with appropriate optic fibres and connected to a glovebox. Spectral adjustments were performed using the Origin software. **Kinetics** were recorded with a Lambda 465 (PerkinElmer) diode array spectrophotometer and  **$\text{H}_2\text{O}_2$  concentrations** were determined according to the procedure described below using a Shimadzu 1800 device.

#### **X-ray quality crystals of $\mathbf{1_{ox}}$ were obtained as follow:**

A MeCN solution of **1** was exposed to air, leading to a colour change from purple to dark green. The resulting solution was evaporated to dryness. X-ray quality crystals were grown for diffusion of  $\text{Et}_2\text{O}$  into a  $\text{CH}_2\text{Cl}_2$  solution of **1<sub>ox</sub>**. The CCDC deposition number for **1<sub>ox</sub>** is 2014256.

#### **Catalytic $\text{H}_2\text{O}_2$ production, detection and quantification.**

The formation of  $\text{Fc}^+$ ,  $\text{Me}_2\text{Fc}^+$ ,  $\text{Me}_8\text{Fc}^+$  or  $\text{Me}_{10}\text{Fc}^+$  in the presence of **1** or  $[\text{Cu}(\text{Tol})_2](\text{OTf})$  ( $\text{OTf}$  = trifluoromethanesulfonate anion and  $\text{Tol}$  = toluene) and 2,6-lutidinium tetrafluoroborate ( $\text{LutHBF}_4$ ) was monitored in air-saturated MeCN at 298 K by visible absorption spectroscopy. In a typical experiment (1/40/400), an air-saturated solution of  $\text{LutHBF}_4$  (25  $\mu\text{L}$ , 2.0 M, 50  $\mu\text{mol}$ , 400 molar eq.) was added to an air-saturated solution of  $\text{Me}_8\text{Fc}$  (2.225 mL, 2.24 mM, 4.98  $\mu\text{mol}$ , 40 molar eq.) in a septum-sealed quartz cuvette (1 cm). An Ar-saturated solution of **1** (250  $\mu\text{L}$ , 0.5mM, 0.125  $\mu\text{mol}$ , 1 molar eq.) was then added. Kinetics traces at  $\lambda_{\text{max}}^{\text{Fc}^+}$  (614 nm,  $\epsilon = 410 \text{ M}^{-1} \text{ cm}^{-1}$ ),  $\lambda_{\text{max}}^{\text{Me}_2\text{Fc}^+}$  (650 nm,  $\epsilon = 290 \text{ M}^{-1} \text{ cm}^{-1}$ ),  $\lambda_{\text{max}}^{\text{Me}_8\text{Fc}^+}$  (750 nm,  $\epsilon = 390 \text{ M}^{-1} \text{ cm}^{-1}$ ) and  $\lambda_{\text{max}}^{\text{Me}_{10}\text{Fc}^+}$  (779 nm,  $\epsilon = 495 \text{ M}^{-1} \text{ cm}^{-1}$ ) (Fig. S1) were monitored using a Lambda 465 (PerkinElmer) diode array spectrophotometer ( $\Delta t = 0.5 \text{ s}$  or  $1 \text{ s}$ ). Control experiments (Fig. S10) were performed in an identical manner by adding  $[\text{Cu}(\text{Tol})_2](\text{OTf})$  in MeCN, (250  $\mu\text{L}$ , 0.5 mM, 0.125  $\mu\text{mol}$ ), MeCN (250  $\mu\text{L}$ ) or  $\text{H}_2\text{O}_2$  (250  $\mu\text{L}$ , 0.5 M, 125  $\mu\text{mol}$ , 100 molar eq.) instead of **1**. All the experiments were triplicated, yielding highly reproducible data (96% identity). The amount of hydrogen peroxide produced was determined by spectroscopic titration with an acidic solution of  $\text{TiO}(\text{tpypH}_4)^{4+}$  complex ( $\text{TiO}$ -tpyp reagent).<sup>[3]</sup> The  $\text{TiO}$ -tpyp reagent ( $\sim 4.5 \cdot 10^{-5} \text{ M}$ ) was prepared by dissolving 3.45 mg of the  $[\text{TiO}(\text{tpyp})]$  complex ( $\geq 90\%$ , from TCI) in 100 mL of 0.05 M  $\text{HCl}_{(\text{aq})}$  and stored at 277 K. A small portion (15  $\mu\text{L}$ ) of each sample solution (collected after observing stable absorbance values along

time) was added to a mixture of TiO-tpyp reagent (250  $\mu\text{L}$ ), 4.8 M perchloric acid (250  $\mu\text{L}$ ) and water (235  $\mu\text{L}$ ). The resulting solution was stirred for 5 min at 298 K. After dilution to 2.5 mL with distilled water, the solution was transferred in a quartz UV-vis cell (1 mm) and the absorbance at  $\lambda = 433$  nm was read using a Shimadzu 1800 device. For the blank experiment, MeCN (15  $\mu\text{L}$ ) was used in place of the reaction mixture. All the experiments were triplicated (97% identity). In these measurements, the  $\text{H}_2\text{O}_2$  content is given by:

$$\Delta A_{\text{sample}(n)} = A_{\text{blank}} - A_{\text{sample}(n)}, (n) \text{ being the sample number} \quad (\text{eqn 1})$$

A calibration curve (Fig S9) was independently obtained using the same procedure (1 mm cuvette) and  $\text{H}_2\text{O}_2$  solutions (prepared by cascade dilutions of commercial 30%  $\text{H}_2\text{O}_2$  titrated at 9.8 M with the  $\text{KMnO}_4$  method.<sup>[3a]</sup> The obtained  $\Delta A$  values ( $\Delta A_{\text{cal}(n)}$ ) were plotted against  $\text{H}_2\text{O}_2$  concentration in the final sample,  $[\text{H}_2\text{O}_2]_{\text{final\_sample}}(\mu\text{M})$ , giving the following calibration curve equation:

$$[\text{H}_2\text{O}_2]_{\text{final sample}} = (\Delta A + 0.0065) / 0.01827 \quad (\text{eqn2})$$

Based on eqn. 2, the amount of hydrogen peroxide in the catalytic reactions was determined based on  $\Delta A_{\text{sample}(n)}$ .  $[\text{H}_2\text{O}_2]$  in the reaction mixture was calculated considering the dilution factor:

$$[\text{H}_2\text{O}_2]_{\text{mother\_sample}}(\mu\text{M}) = [\text{H}_2\text{O}_2]_{\text{final\_sample}} * (2500/15) \quad (\text{eqn3})$$

The results were then confronted to the theoretical  $[\text{H}_2\text{O}_2]$  for a 100% yield and the remaining electron consumption finally attributed to  $\text{H}_2\text{O}$  production.

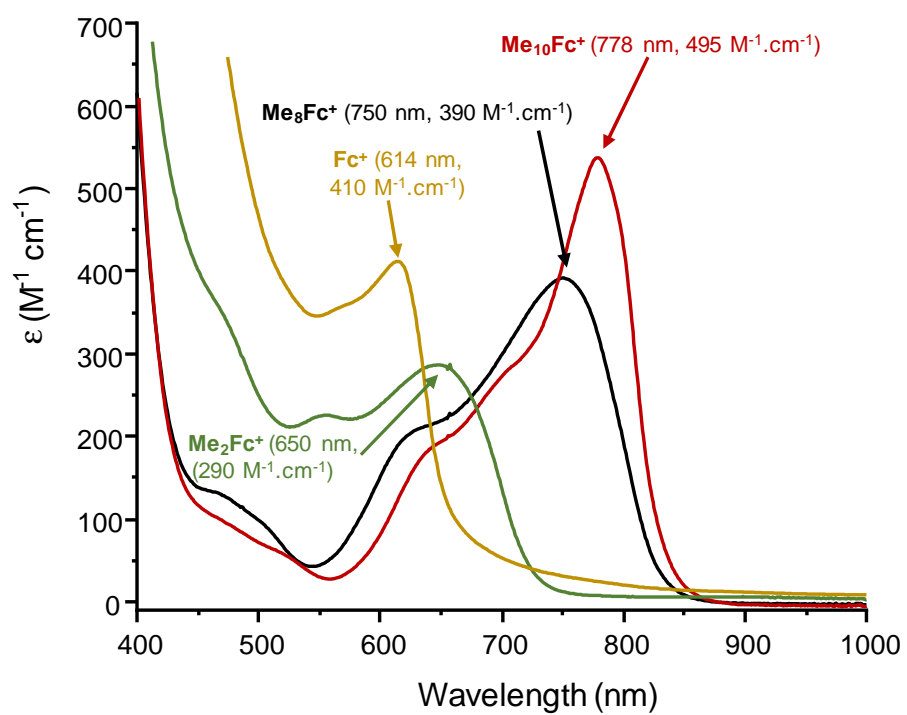

**Figure S1.** UV-vis spectra of  $\text{Fc}^+$ ,  $\text{Me}_2\text{Fc}^+$ ,  $\text{Me}_8\text{Fc}^+$  and  $\text{Me}_{10}\text{Fc}^+$  in MeCN at 298 K.

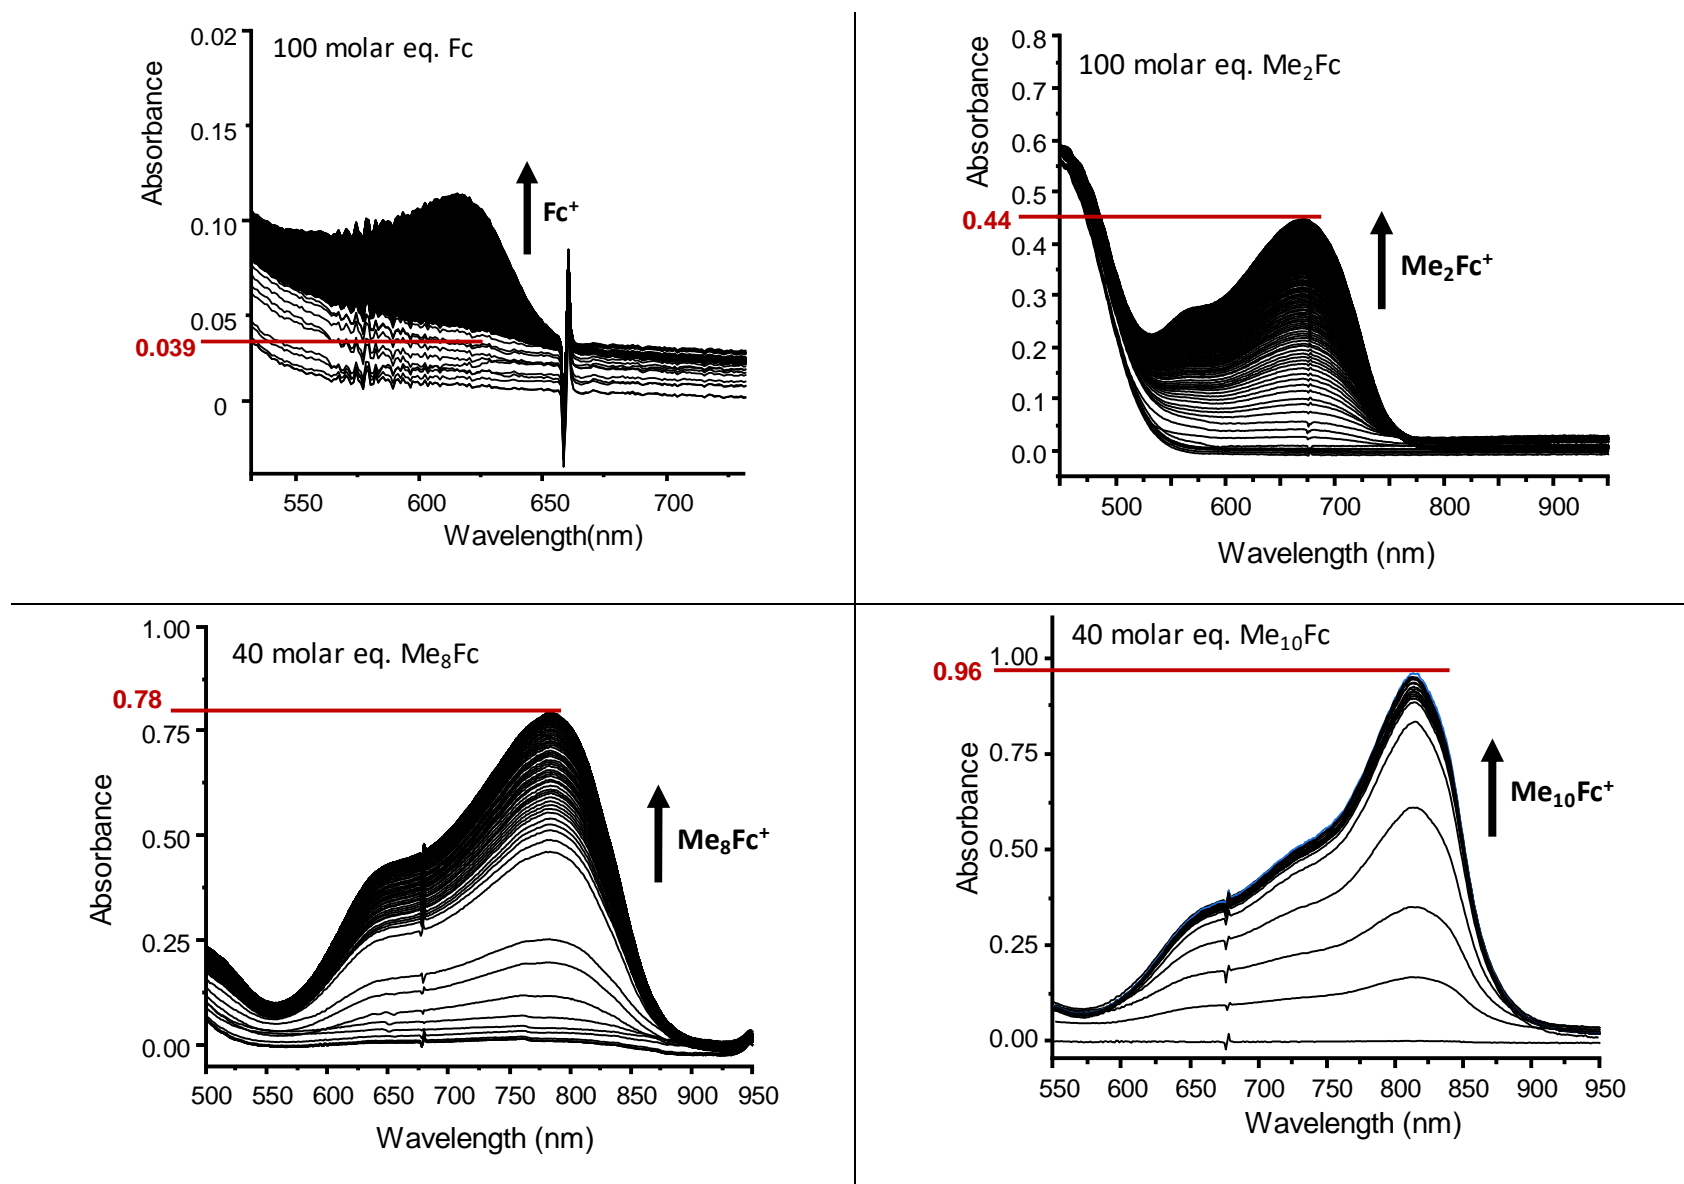

**Figure S2.** Typical UV-vis changes for the catalytic ORR by **1** in air-saturated MeCN with Fc (100 molar eq.), Me<sub>2</sub>Fc (100 molar eq.), Me<sub>8</sub>Fc (40 molar eq.) and Me<sub>10</sub>Fc (40 molar eq.) as electron source and LutHBF<sub>4</sub> as proton source. Exp. cond.: [1] = 0.5 mM, V = 250  $\mu$ L,  $n_1 = 1.25 \cdot 10^{-7}$  mole; [LutHBF<sub>4</sub>] = 2 M, V = 25  $\mu$ L,  $n_{\text{LutHBF}_4} = 5.0 \cdot 10^{-5}$  mole (400 molar eq.); [Me<sub>2</sub>Fc] = [Fc] = 5.6 mM, V = 2.225 mL,  $n_{\text{Me}_2\text{Fc}} = n_{\text{Fc}} = 1.25 \cdot 10^{-5}$  mole; [Me<sub>8</sub>Fc] = [Me<sub>10</sub>Fc] = 2.24 mM, V = 2.225 mL,  $n_{\text{Me}_8\text{Fc}} = n_{\text{Me}_{10}\text{Fc}} = 5.0 \cdot 10^{-6}$  mole;  $V_{\text{final}} = 2.5$  mL; T = 298 K; 1 cm path length,  $\Delta t = 0.25$  s to 1 s; the values in red are discussed in the figures of the corresponding kinetic traces.

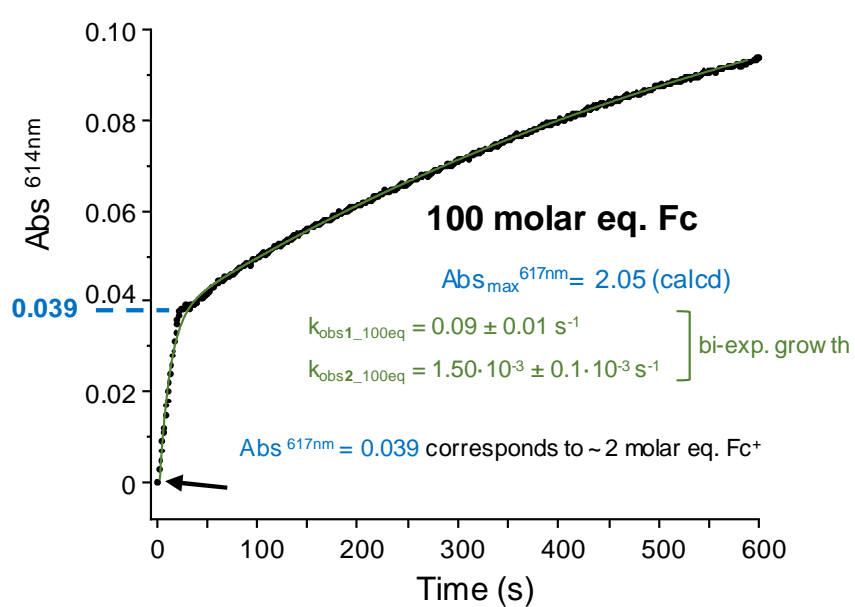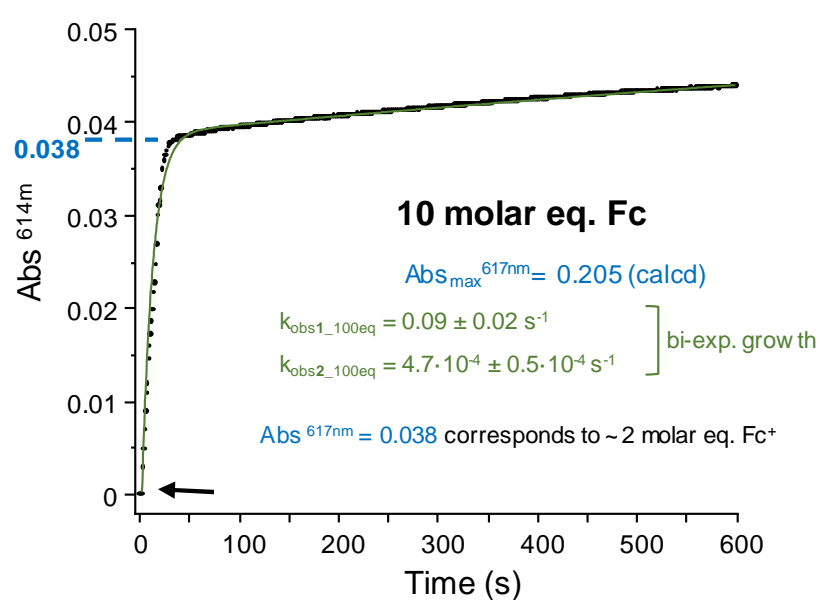

- 2 molar eq. =  $2 \times 1.25 \cdot 10^{-7} = 2.5 \cdot 10^{-7}$  mole in a final volume of 2.5 mL, thus giving  $[Fc^+] = 0.1 \text{ mM}$ ;  $\epsilon_{(Fc^+)} = 410 \text{ M}^{-1} \text{ cm}^{-1}$  leads to  $A = 0.041$

**Figure S3.** Kinetic profiles ( $Abs_{\max}^{617nm}$ ) for the catalytic ORR by **1** with  $LutHBF_4$  and Fc (10 and 100 molar eq.) in air-saturated MeCN. Exp. cond.:  $[1] = 0.5 \text{ mM}$ ,  $V = 250 \mu\text{L}$ ,  $n_1 = 1.25 \cdot 10^{-7} \text{ mole}$ ;  $[LutHBF_4] = 2 \text{ M}$ ,  $V = 25 \mu\text{L}$ ,  $n_{LutHBF_4} = 5.0 \cdot 10^{-5} \text{ mole}$  (400 molar eq.);  $[Fc]_{\text{initial}} = 0.56$  and  $5.6 \text{ mM}$ ,  $V_{\text{initial}} = 2.225 \text{ mL}$  giving  $n_{Fc} = 1.25 \cdot 10^{-6}$  and  $1.25 \cdot 10^{-5} \text{ mole}$ ;  $V_{\text{final}} = 2.5 \text{ mL}$ ;  $T = 298 \text{ K}$ ;  $1 \text{ cm}$  path length,  $\Delta t = 1 \text{ s}$ ; arrows indicate the injection of **1** in the reaction mixture.



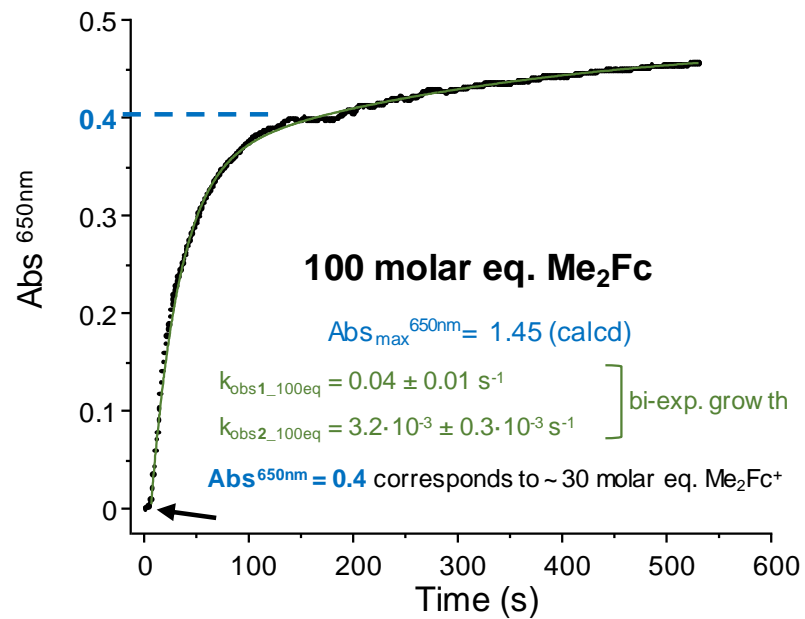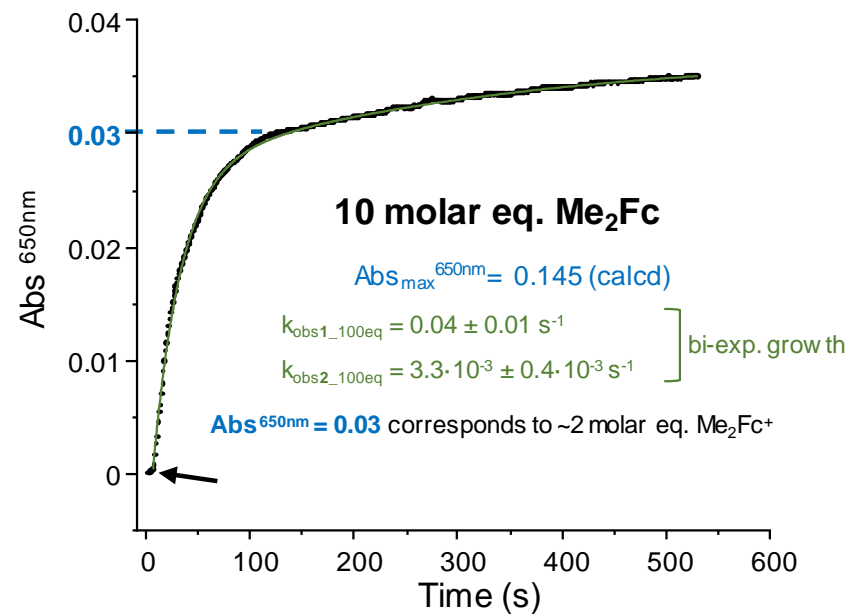

• For 2 molar eq. Me<sub>2</sub>Fc<sup>+</sup> =  $2 \times 1.25 \times 10^{-7} = 2.5 \cdot 10^{-7}$  mole in a final volume of 2.5 mL, thus giving [Me<sub>2</sub>Fc<sup>+</sup>] = 0.1 mM

• For 30 molar eq. Me<sub>2</sub>Fc<sup>+</sup>,  $A = 0.43$

$\epsilon_{(Me_2Fc^+)} = 290 \text{ M}^{-1} \text{ cm}^{-1}$  leads to  $A = 290 \times 1 \times 0.1 \times 10^{-3} = 0.029$

**Figure S4.** Kinetic profiles ( $Abs_{max}^{650nm}$ ) for the catalytic ORR by **1** with LutHBF<sub>4</sub> and Me<sub>2</sub>Fc (10 and 100 molar eq.) in air-saturated MeCN. Exp. cond.: [1] = 0.5 mM, V = 250  $\mu$ L,  $n_1 = 1.25 \cdot 10^{-7}$  mole; [LutHBF<sub>4</sub>] = 2 M, V = 25  $\mu$ L,  $n_{LutHBF_4} = 5.0 \cdot 10^{-5}$  mole (400 molar eq.); [Me<sub>2</sub>Fc]<sub>initial</sub> = 0.56 and 5.6 mM, V<sub>initial</sub> = 2.225 mL giving  $n_{Me_2Fc} = 1.25 \cdot 10^{-6}$  and  $1.25 \cdot 10^{-5}$  mole; V<sub>final</sub> = 2.5 mL; T = 298 K; 1 cm path length,  $\Delta t = 1$  s; arrows indicate the injection of **1** in the reaction mixture.

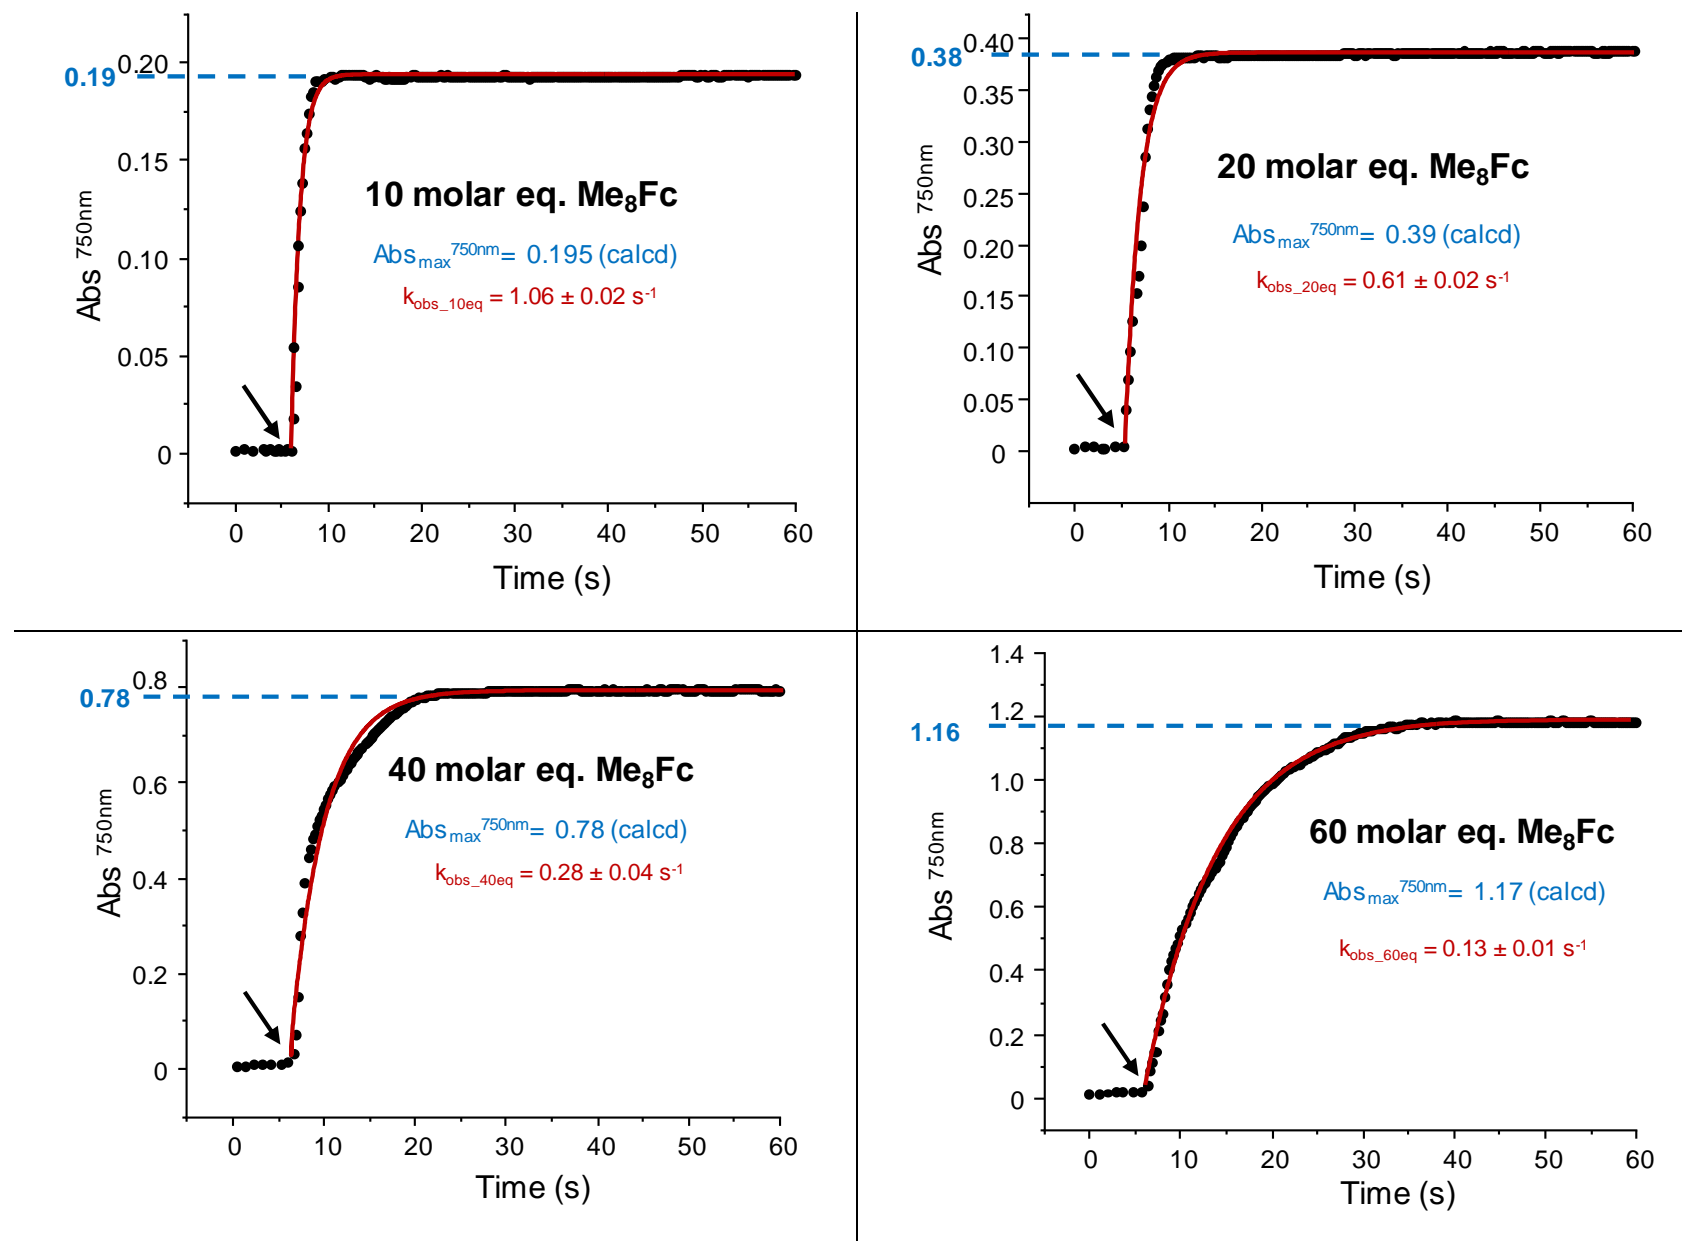

**Figure S5.** Kinetic profiles ( $Abs_{max}^{750nm}$ ) for the catalytic ORR by **1** with LutHBF<sub>4</sub> and Me<sub>8</sub>Fc (10, 20, 40 and 60 molar eq.) in air-saturated MeCN. Exp. cond.: [**1**] = 0.5 mM, V = 250  $\mu$ L,  $n_1 = 1.25 \cdot 10^{-7}$  mole; [LutHBF<sub>4</sub>] = 2 M, V = 25  $\mu$ L,  $n_{LutHBF_4} = 5.0 \cdot 10^{-5}$  mole (400 molar eq.); [Me<sub>8</sub>Fc]<sub>initial</sub> = 0.56, 1.12, 2.25 and 3.37 mM, V<sub>initial</sub> = 2.225 mL giving  $n_{Me_8Fc} = 1.25 \cdot 10^{-6}$ ,  $2.50 \cdot 10^{-6}$ ,  $5.0 \cdot 10^{-6}$  and  $7.5 \cdot 10^{-6}$  mole; V<sub>final</sub> = 2.5 mL; T = 298 K; 1 cm path length,  $\Delta t = 0.25$  s; arrows indicate the injection of **1** in the reaction mixture.

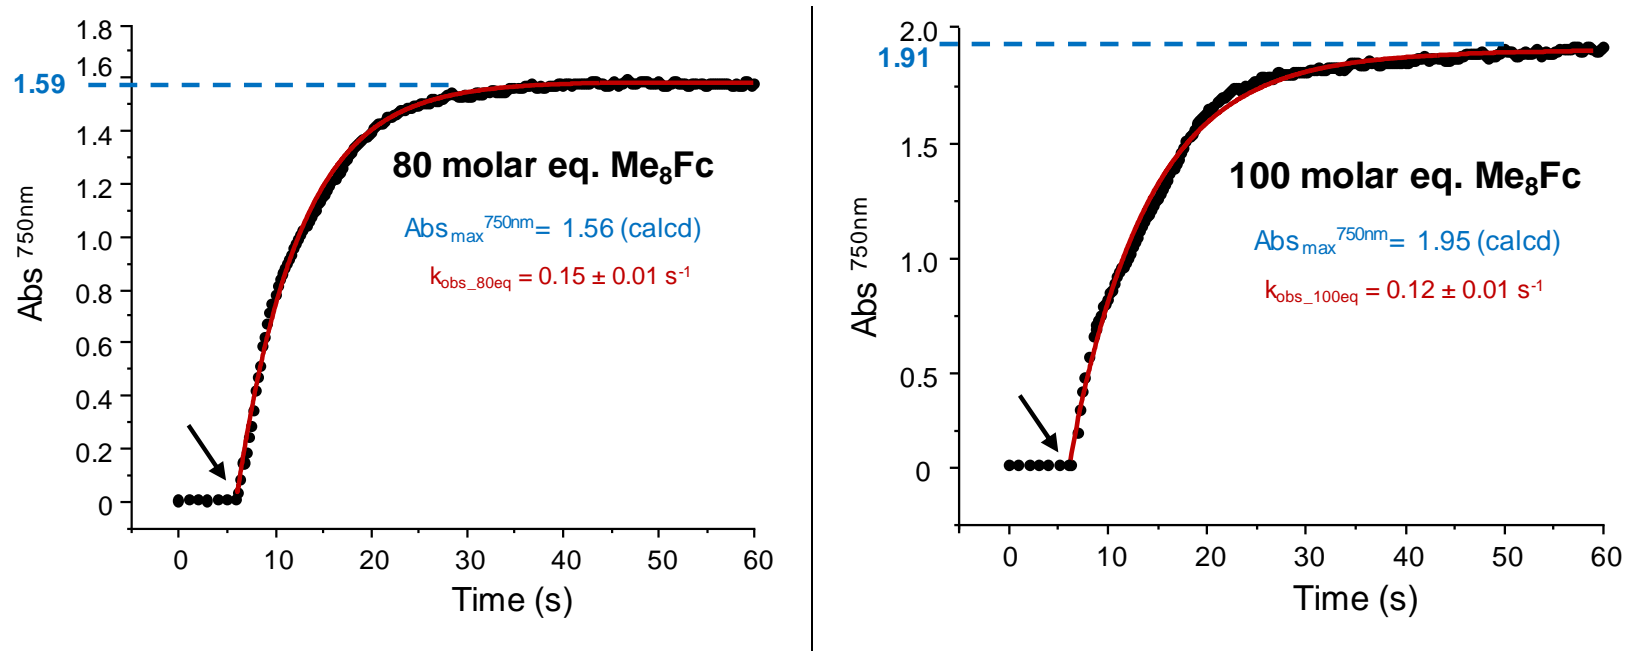

**Figure S6.** Kinetic profiles ( $Abs_{max}^{750nm}$ ) for the catalytic ORR by **1** with LutHBF<sub>4</sub> and Me<sub>8</sub>Fc (80 and 100 molar eq.) in air-saturated MeCN. Exp. cond.: [**1**] = 0.5 mM, V = 250  $\mu$ L,  $n_1 = 1.25 \cdot 10^{-7}$  mole; [LutHBF<sub>4</sub>] = 2 M, V = 25  $\mu$ L,  $n_{LutHBF_4} = 5.0 \cdot 10^{-5}$  mole (400 molar eq.); [Me<sub>8</sub>Fc]<sub>initial</sub> = 4.49 and 5.6 mM, V<sub>initial</sub> = 2.225 mL giving  $n_{Me_8Fc} = 10^{-5}$  and  $1.25 \cdot 10^{-5}$  mole); V<sub>final</sub> = 2.5 mL; T = 298 K; 1 cm path length,  $\Delta t = 0.25$  s; arrows indicate the injection of **1** in the reaction mixture.

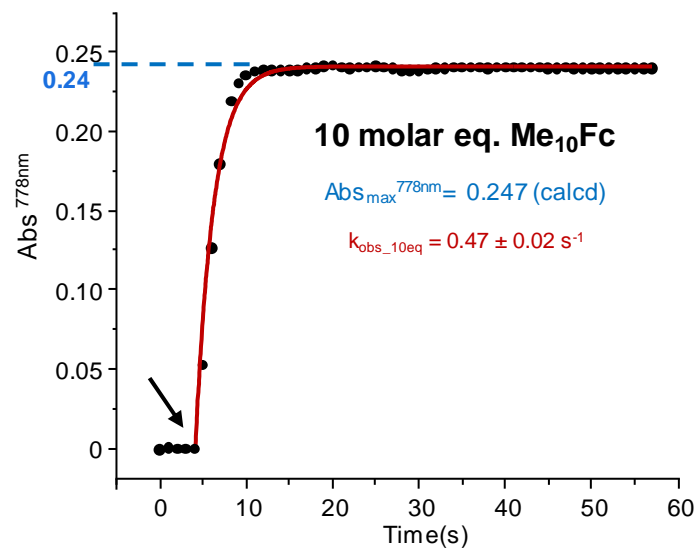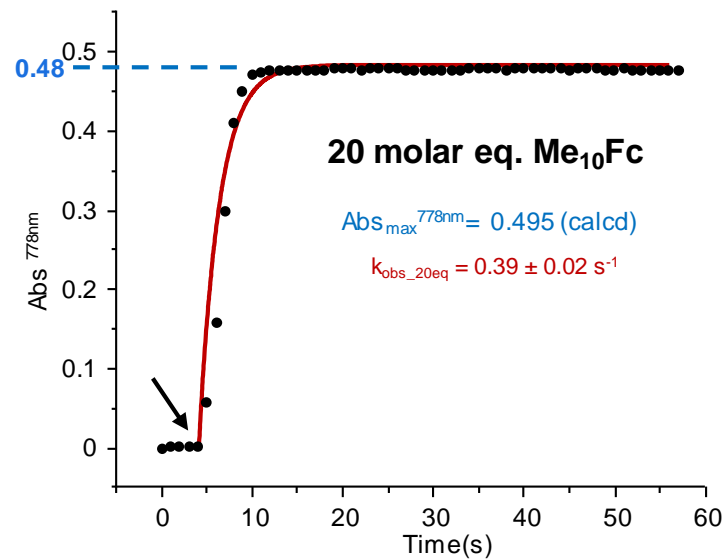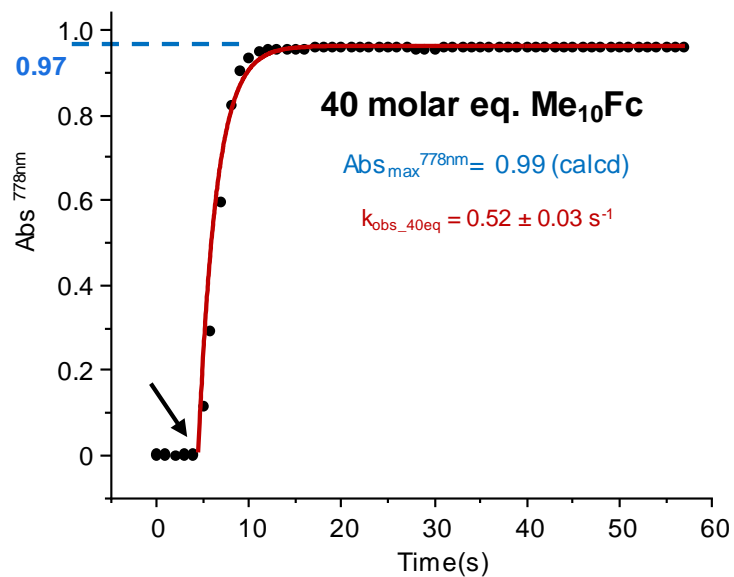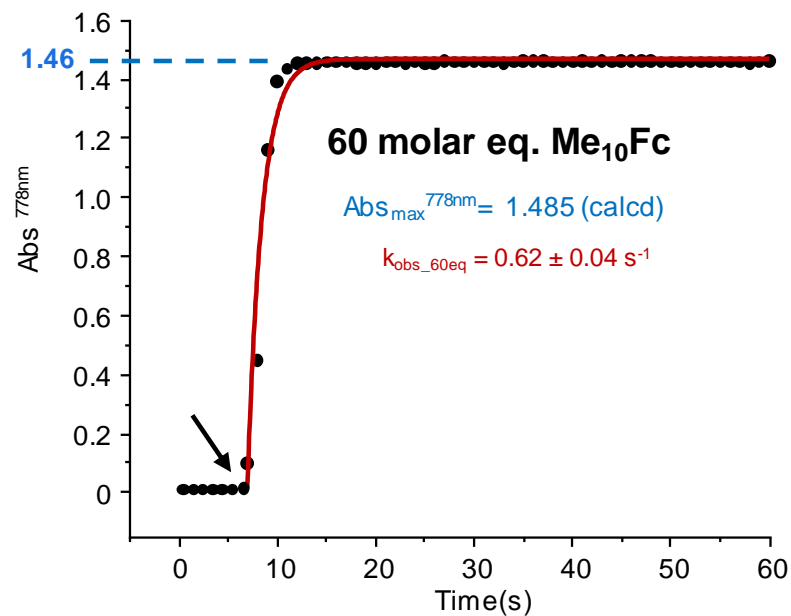

**Figure S7.** Kinetic profiles ( $Abs_{\max}^{778\text{nm}}$ ) for the catalytic ORR by **1** with  $\text{LuTlHF}_4$  and  $\text{Me}_{10}\text{Fc}$  (10, 20, 40 and 60 molar eq.) in air-saturated MeCN. Exp. cond.:  $[\mathbf{1}] = 0.5 \text{ mM}$ ,  $V = 250 \text{ }\mu\text{L}$ ,  $n_1 = 1.25 \cdot 10^{-7} \text{ mole}$ ;  $[\text{LuTlHF}_4] = 2 \text{ M}$ ,  $V = 25 \text{ }\mu\text{L}$ ,  $n_{\text{LuTlHF}_4} = 5.0 \cdot 10^{-5} \text{ mole}$  (400 molar eq.);  $[\text{Me}_{10}\text{Fc}]_{\text{initial}} = 0.56, 1.12, 2.25 \text{ and } 3.37 \text{ mM}$ ,  $V_{\text{initial}} = 2.225 \text{ mL}$  giving  $n_{\text{Me}_{10}\text{Fc}} = 1.25 \cdot 10^{-6}, 2.50 \cdot 10^{-6}, 5.0 \cdot 10^{-6} \text{ and } 7.5 \cdot 10^{-6} \text{ mole}$ ;  $V_{\text{final}} = 2.5 \text{ mL}$ ;  $T = 298 \text{ K}$ ;  $1 \text{ cm}$  path length,  $\Delta t = 1 \text{ s}$ ; arrows indicate the injection of **1** in the reaction mixture.

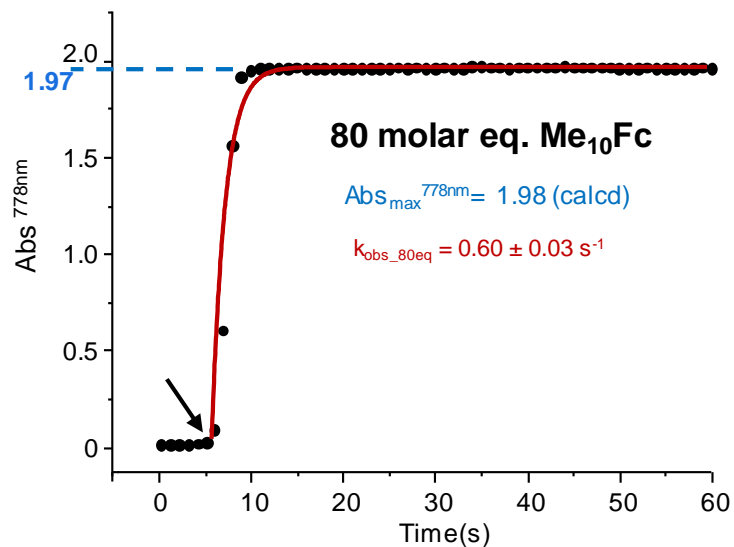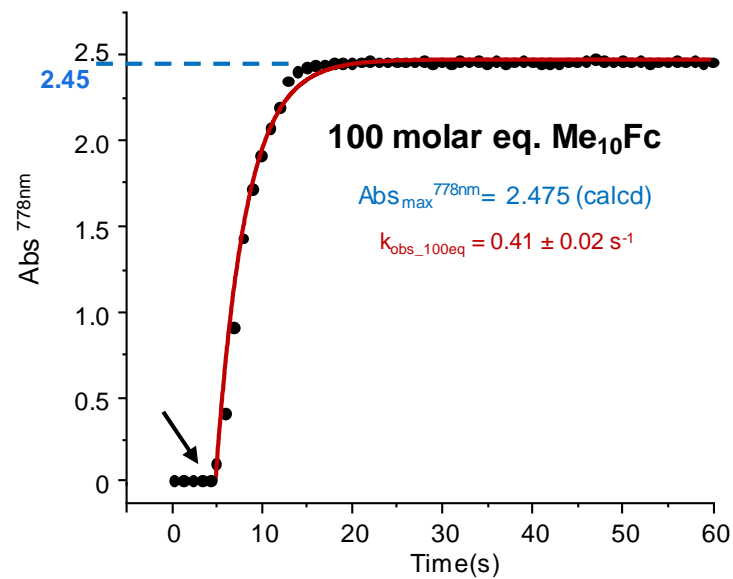

**Figure S8.** Kinetic profiles ( $Abs_{\max}^{778\text{nm}}$ ) for the catalytic ORR by **1** with LutHBF<sub>4</sub> and Me<sub>10</sub>Fc (80 and 100 molar eq.) in air-saturated MeCN. Exp. cond.: [1] = 0.5 mM, V = 250 μL,  $n_1 = 1.25 \cdot 10^{-7}$  mole; [LutHBF<sub>4</sub>] = 2 M, V = 25 μL,  $n_{\text{LutHBF}_4} = 5.0 \cdot 10^{-5}$  mole (400 molar eq.); [Me<sub>10</sub>Fc]<sub>initial</sub> = 4.49 and 5.6 mM, V<sub>initial</sub> = 2.225 mL,  $n_{\text{Me}_{10}\text{Fc}} = 10^{-5}$  and  $1.25 \cdot 10^{-5}$  mole); V<sub>final</sub> = 2.5 mL; T = 298 K; 1 cm path length,  $\Delta t = 1$  s; arrows indicate the injection of **1** in the reaction mixture.

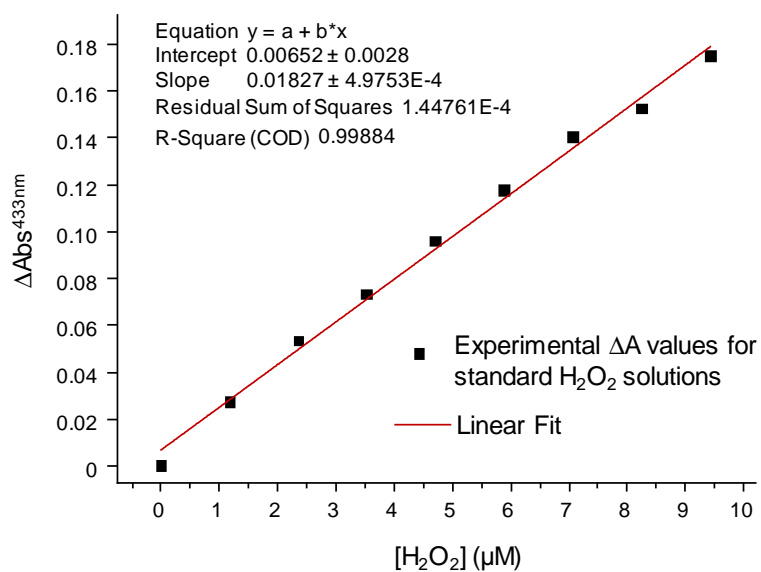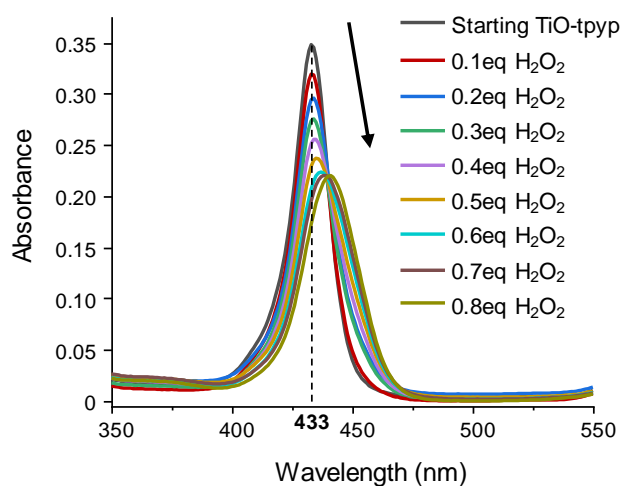

**Figure S9.** (top)  $H_2O_2$  calibration curve using the TiO-tpyp reagent; (bottom) corresponding UV-vis traces; air-saturated MeCN solutions, 298 K, 1 mm path length.

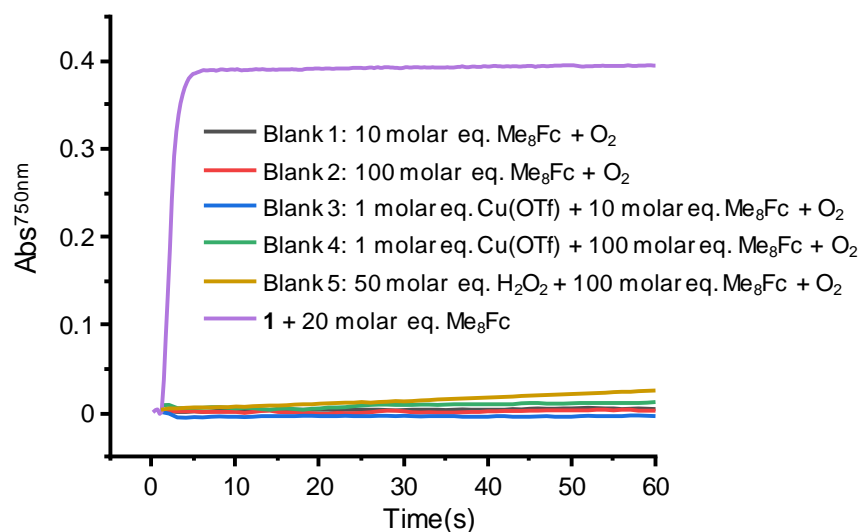

**Figure S10.** Blank experiments (Blanks 1-5) attesting for the absence of reactivity of  $\text{Me}_8\text{Fc}$  with  $\text{O}_2$  ( — and — ),  $\text{Cu}(\text{OTf})$  with  $\text{Me}_8\text{Fc}$  and  $\text{O}_2$  ( — and — ),  $\text{H}_2\text{O}_2 + \text{Me}_8\text{Fc} + \text{O}_2$  ( — ) compared to **1** ( — ); *Blank 1*: 250  $\mu\text{L}$  MeCN + 2.225 mL  $\text{Me}_8\text{Fc}$  (0.56 mM), 25  $\mu\text{L}$   $\text{LutHBF}_4$  (2 M); *Blank 2*: 250  $\mu\text{L}$  MeCN + 2.225 mL  $\text{Me}_8\text{Fc}$  (5.6 mM), 25  $\mu\text{L}$   $\text{LutHBF}_4$  (2 M); *Blank 3*: 250  $\mu\text{L}$   $\text{Cu}(\text{OTf})$  (0.5 mM in MeCN) + 2.225 mL  $\text{Me}_8\text{Fc}$  (0.56 mM), 25  $\mu\text{L}$   $\text{LutHBF}_4$  (2 M); *Blank 4*: 250  $\mu\text{L}$   $\text{Cu}(\text{OTf})$  (0.5 mM in MeCN) + 2.225 mL  $\text{Me}_8\text{Fc}$  (5.6 mM), 25  $\mu\text{L}$   $\text{LutHBF}_4$  (2 M); *Blank 5*: 250  $\mu\text{L}$   $\text{H}_2\text{O}_2$  (25 mM) + 2.225 mL  $\text{Me}_8\text{Fc}$  (5.6 mM), 25  $\mu\text{L}$   $\text{LutHBF}_4$  (2 M);  $V_{\text{final}} = 2.5$  mL;  $T = 298$  K; air-saturated MeCN solutions.  $\text{Me}_8\text{Fc}^+$  accumulation is only detected in the presence of **1** (increase in absorbance at 750 nm).

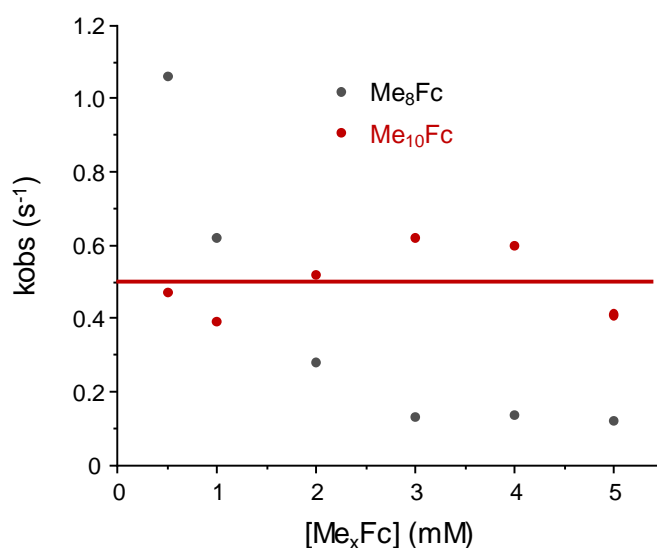

**Figure S11.** Plot of the *pseudo*-first-order rate constants ( $k_{\text{obs}}$ ) versus  $[\text{Me}_x\text{Fc}]$  for the ORR catalysed by **1** in the presence of 400 molar eq.  $\text{LutHBF}_4$  in air-saturated MeCN at 298 K.

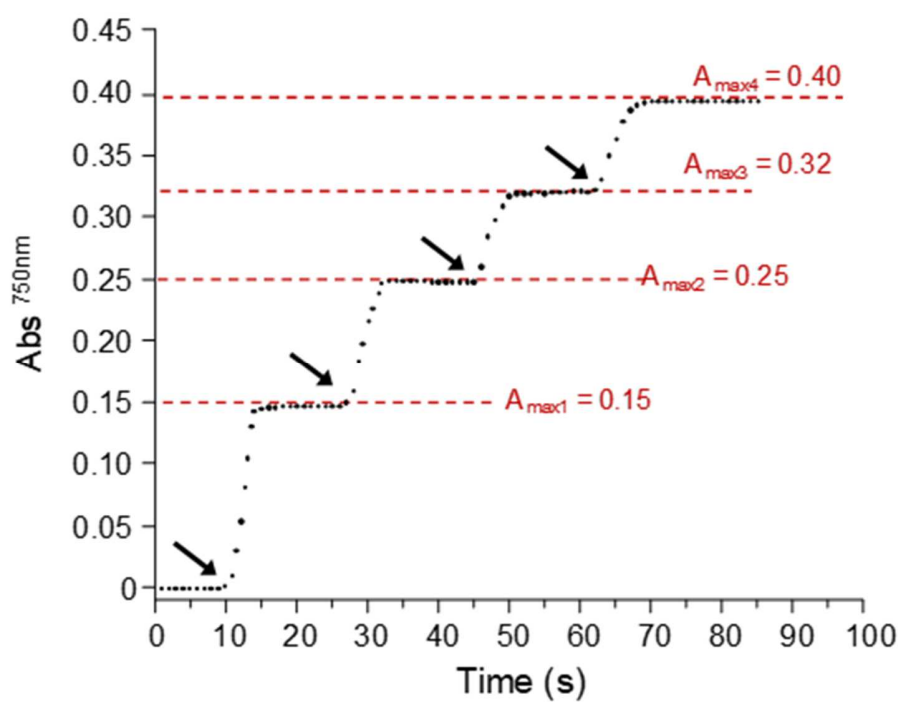

**Figure S12.**  $\text{Me}_8\text{Fc}^+$  accumulation (by monitoring the absorbance at 750 nm) upon successive runs under  $\text{H}_2\text{O}_2$  production conditions. Arrows indicate  $\text{Me}_8\text{Fc}$  injection (10 molar eq.) and the dotted red lines the theoretical absorbance values for each run, taking into account dilution factors. Exp. cond.:  $[\mathbf{1}] = 0.05 \text{ mM}$ ,  $\mathbf{1} / \text{Me}_8\text{Fc} / \text{LutHBF}_4$  at 1/10/400, air-saturated MeCN, 298 K.



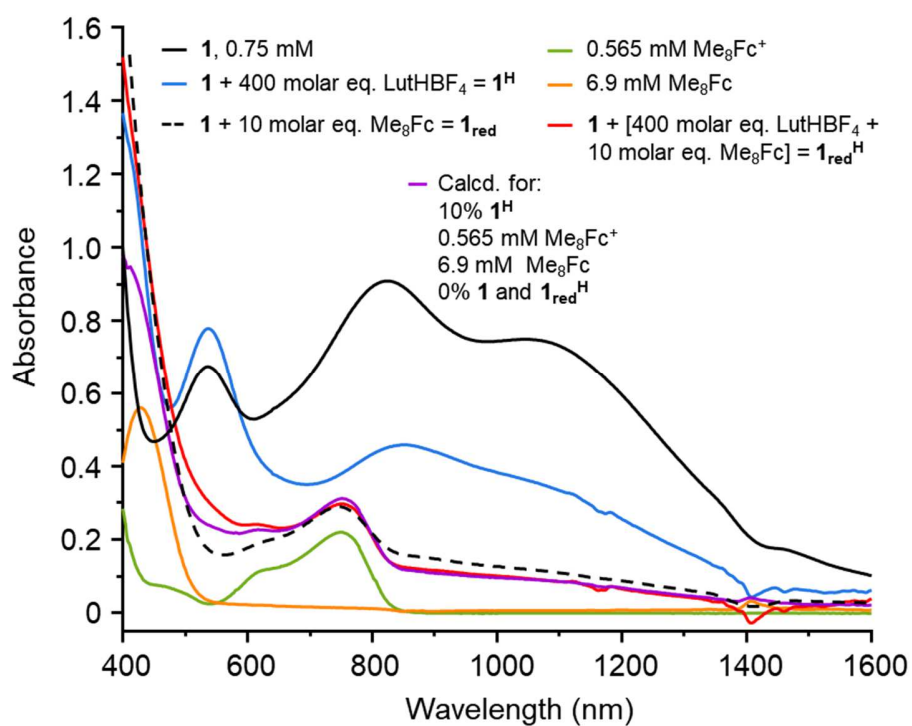

**Figure S13.** Changes in the UV-vis/NIR spectrum of **1** (0.75 mM) in the presence of proton and electron sources under inert atmosphere; MeCN, 298 K, path length = 1 cm.

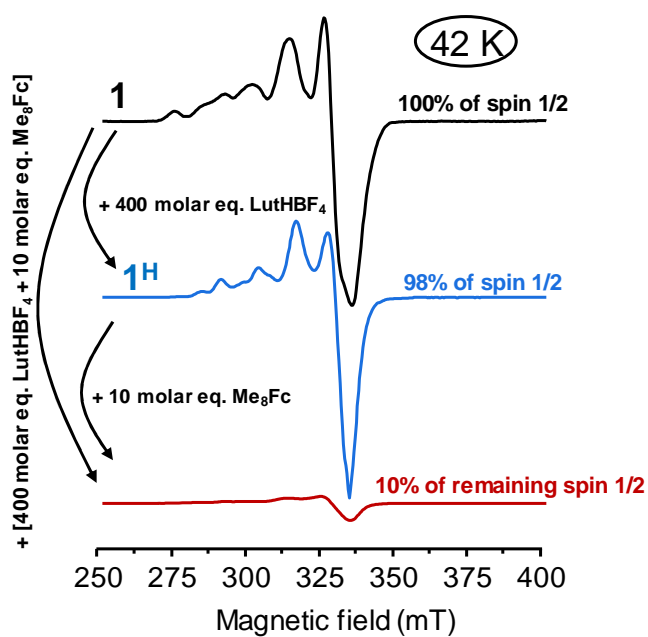

**Figure S14.** Changes in the X-band (9.39 GHz) EPR spectrum of **1** (black) upon the subsequent reaction with LutHBF<sub>4</sub> (400 molar eq., blue) and Me<sub>3</sub>Fc (10 molar eq., red) or a mixture of both reagents in MeCN and under inert atmosphere at 42 K; [**1**] = 0.75 mM; power 0.25 mW; mod. ampl. 1 mT; mod. freq. 100 kHz.

ESI spectrum of : **1** + 10 molar eq.  $\text{LutHBF}_4$  + 5 molar eq.  $\text{Me}_8\text{Fc}$   $\longrightarrow$   $\mathbf{1}_{\text{red}}^{\text{H}}$

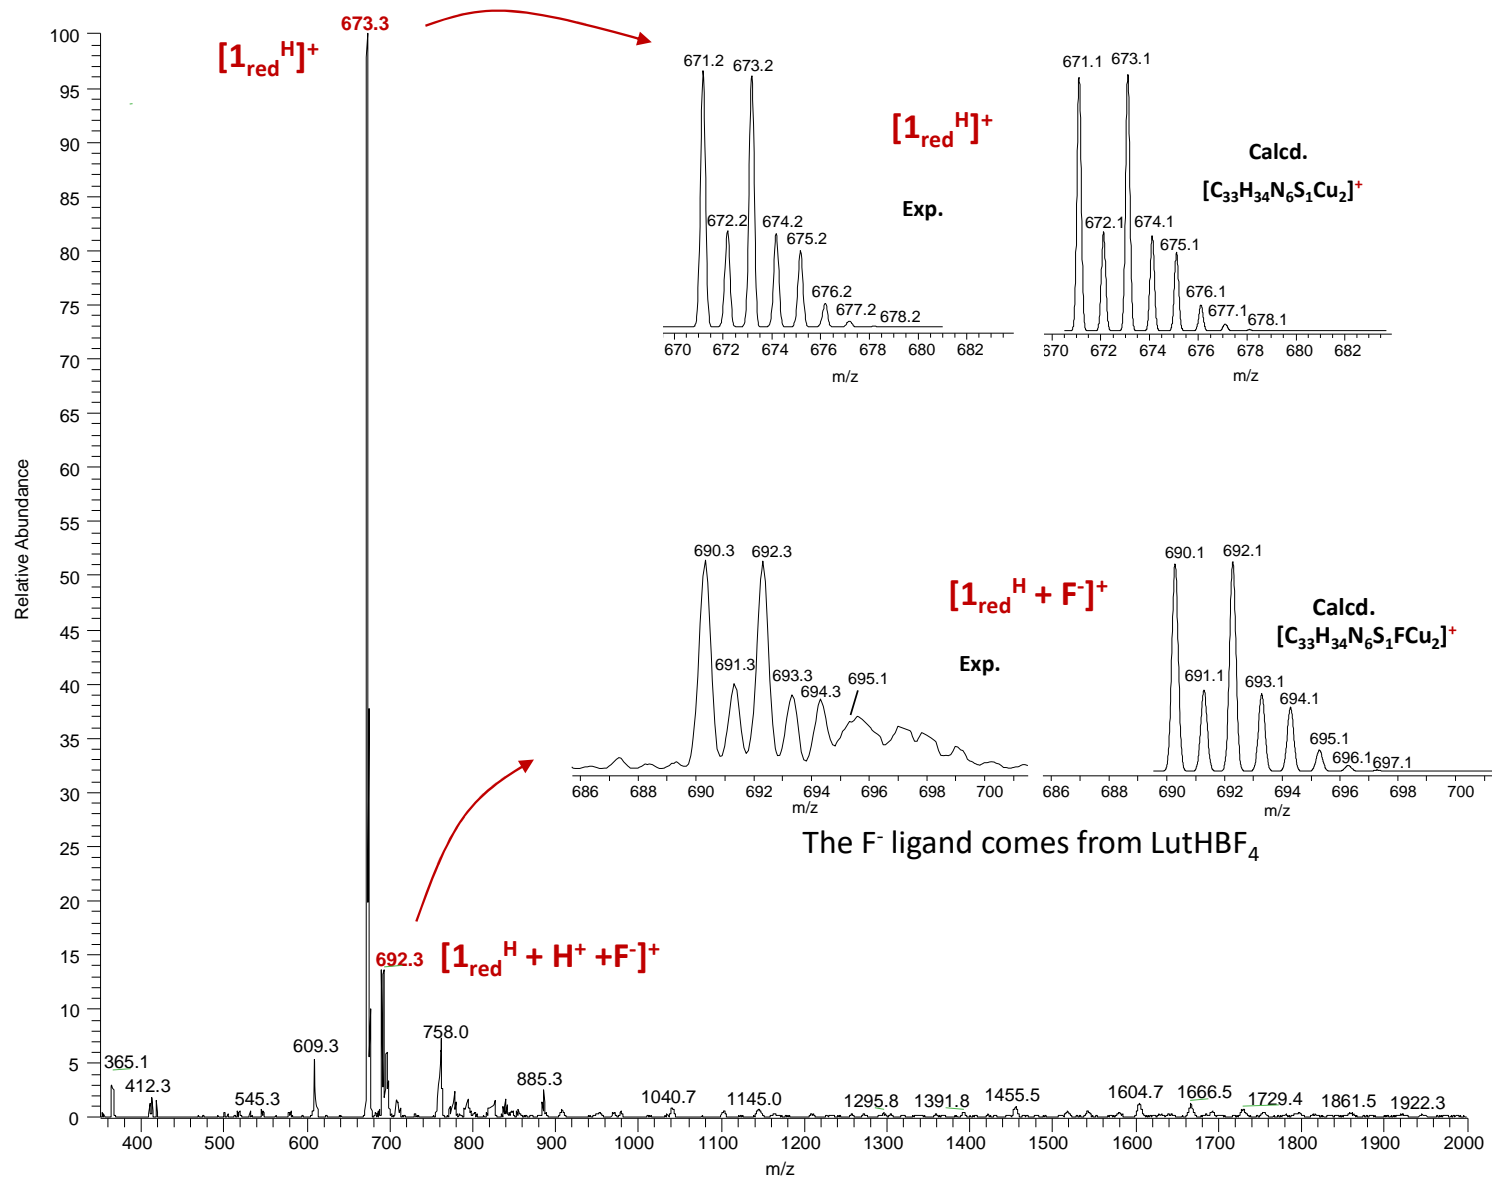

Figure S15. Electrospray ionization mass spectrum of *in situ* generated  $\mathbf{1}_{\text{red}}^{\text{H}}$  from the reaction of **1** with  $\text{LutHBF}_4$  and  $\text{Me}_8\text{Fc}$  in MeCN.

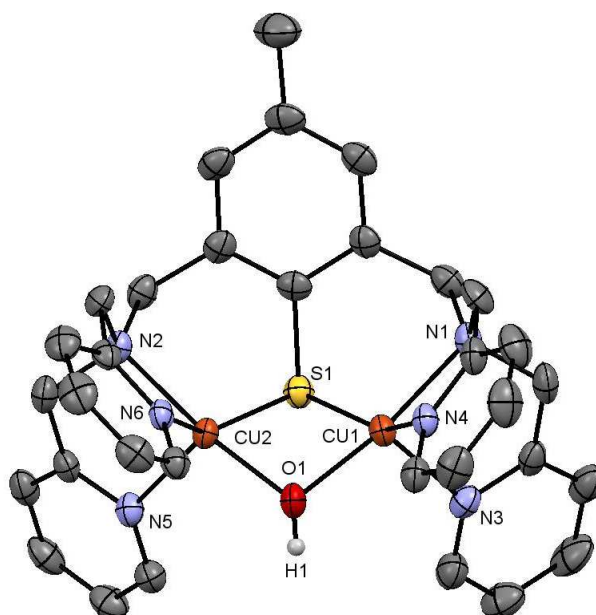

**Figure S16.** ORTEP diagram of dicationic  $1_{ox}^{2+}$  with all non-H atoms shown as 50% thermal ellipsoids. Selected interatomic distances ( $\text{\AA}$ ) and angles (deg): Cu1-Cu2, 2.9238(5); Cu1-S1, 2.3447(9); Cu1-N1, 2.082(3); Cu1-N3, 2.150(3); Cu1-N4, 2.029(3); Cu2-S1, 2.3728(10); Cu2-N2, 2.071(3); Cu1-N5, 2.176(3); Cu1-N6, 2.014(3); Cu1-S1-Cu2, 76.60(3); Cu1-O1-Cu2, 97.82(11). CCDC deposition number 2014256, see Tables S3 and S4 for additional details.

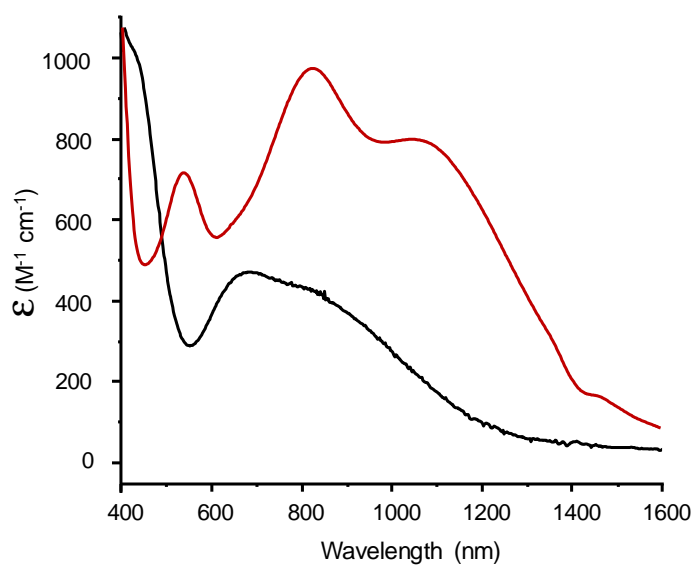

**Figure S17.** UV-vis/NIR spectra of **1** before (red) and after ( $1_{ox}$ , black) exposure to air in MeCN at 298 K.

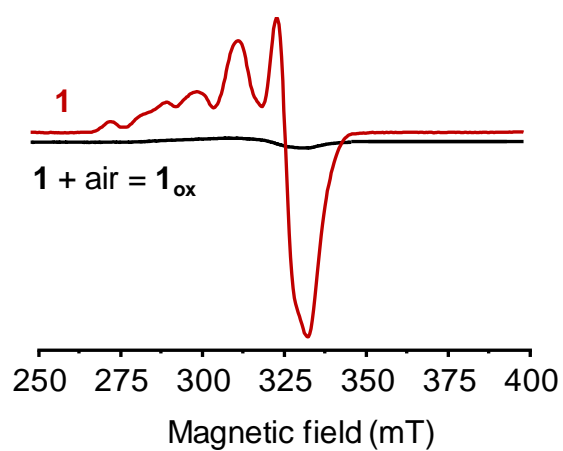

**Figure S18.** Changes in the X-band (9.39 GHz) EPR spectrum of **1** before (red) and after (black, **1<sub>ox</sub>**) exposure to air in MeCN at 42 K; [**1**] = 0.75 mM, power 0.25 mW; mod. ampl. 1 mT; mod. freq. 100 kHz.

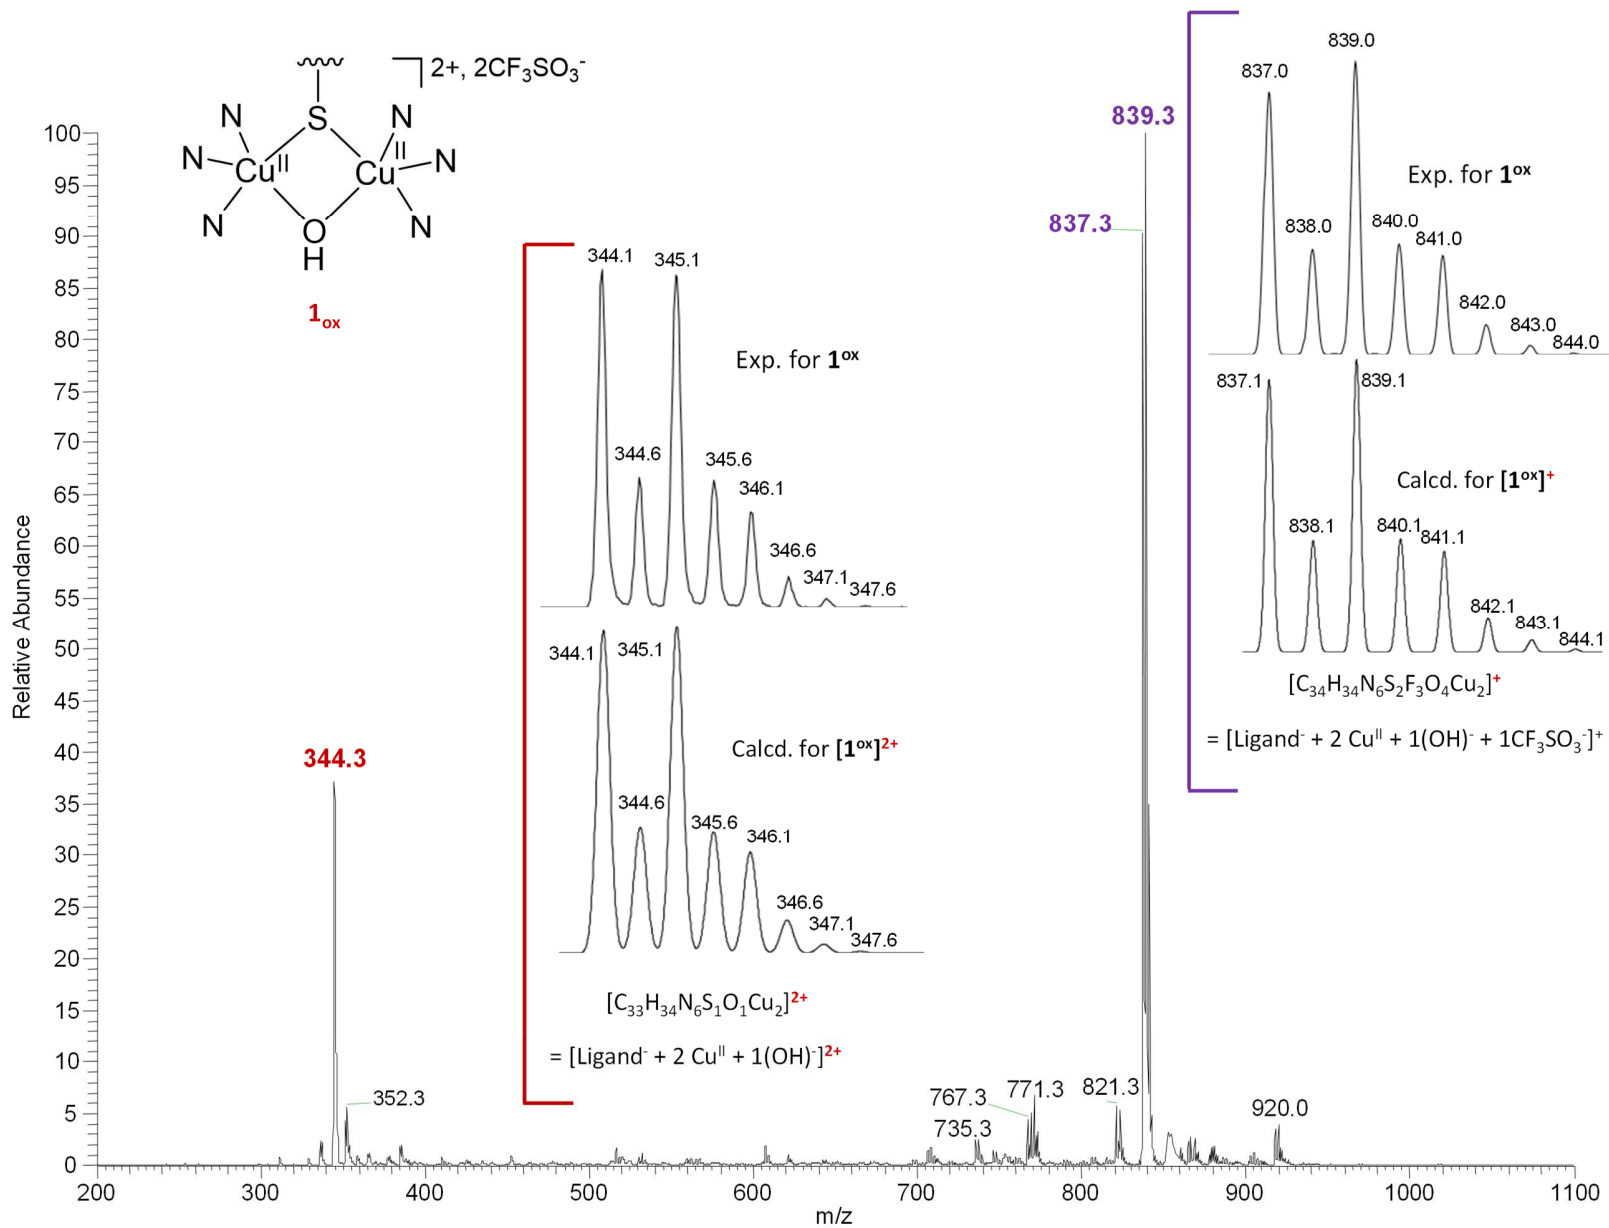

**Figure S19.** Electrospray ionization mass spectrum of **1<sub>ox</sub>** generated from air oxidation of a MeCN solution of **1**.

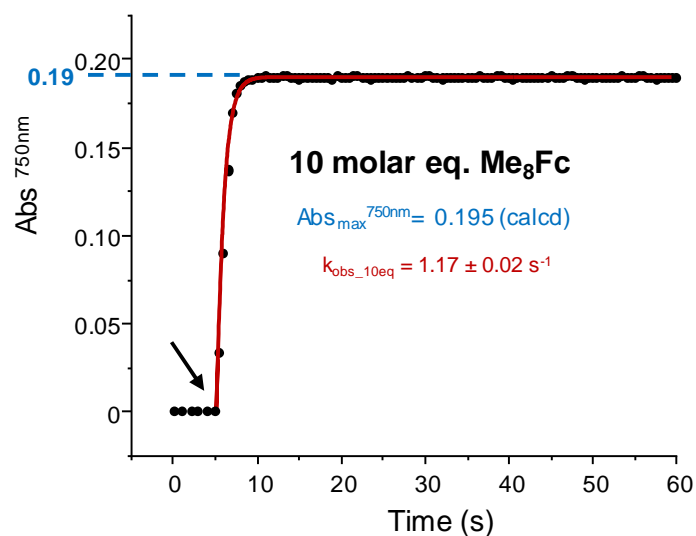

**Figure S20.** Kinetic profiles ( $Abs_{\max}^{750\text{nm}}$ ) resulting from the reaction of  $\mathbf{1}^{\text{ox}}$  with an air-saturated MeCN mixture of  $\text{Me}_8\text{Fc}$  and  $\text{LutHBF}_4$  (1/10/400). Exp. cond.:  $[\mathbf{1}^{\text{ox}}] = 0.5 \text{ mM}$ ,  $V = 250 \mu\text{L}$ ,  $n_1 = 1.25 \cdot 10^{-7} \text{ mole}$ ;  $[\text{Me}_8\text{Fc}]_{\text{initial}} = 0.56 \text{ mM}$ ,  $V_{\text{initial}} = 2.225 \text{ mL}$ ;  $n_{\text{Me}_8\text{Fc}} = 1.25 \cdot 10^{-6} \text{ mole}$ ;  $[\text{LutHBF}_4] = 2 \text{ M}$ ,  $V = 25 \mu\text{L}$ ,  $n_{\text{LutHBF}_4} = 5.0 \cdot 10^{-5} \text{ mole}$  (400 molar eq.);  $V_{\text{final}} = 2.5 \text{ mL}$ ;  $T = 298 \text{ K}$ ;  $1 \text{ cm}$  path length,  $\Delta t = 0.5 \text{ s}$ .

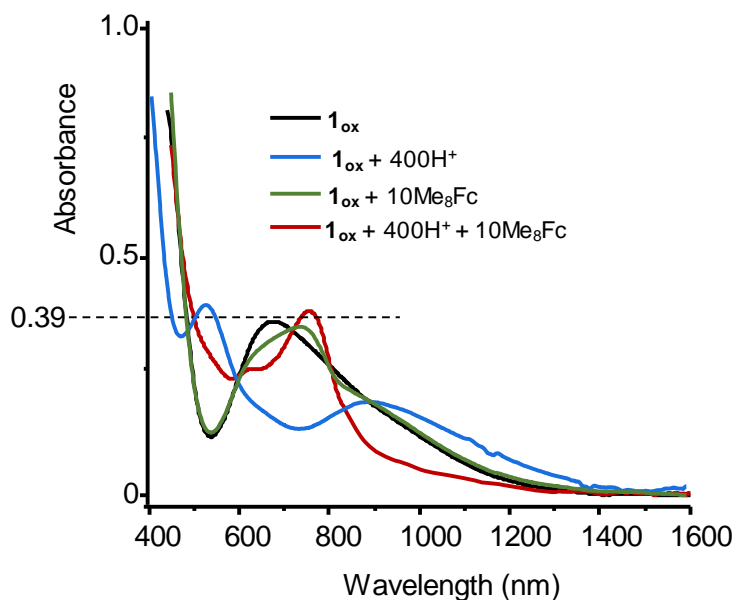

**Figure S21.** Changes in the UV-vis spectrum of  $\mathbf{1}^{\text{ox}}$  (0.5 mM) consecutive to the addition of  $\text{LutHBF}_4$ ,  $\text{Me}_8\text{Fc}$  or a combination under inert atmosphere in MeCN at 298 K; path length = 1 cm. The theoretical value of 0.39 in absorbance corresponds to a quantitative  $2e^-$  reduction of  $\mathbf{1}^{\text{ox}}$  or  $\mathbf{1}^{\text{oxH}}$ .

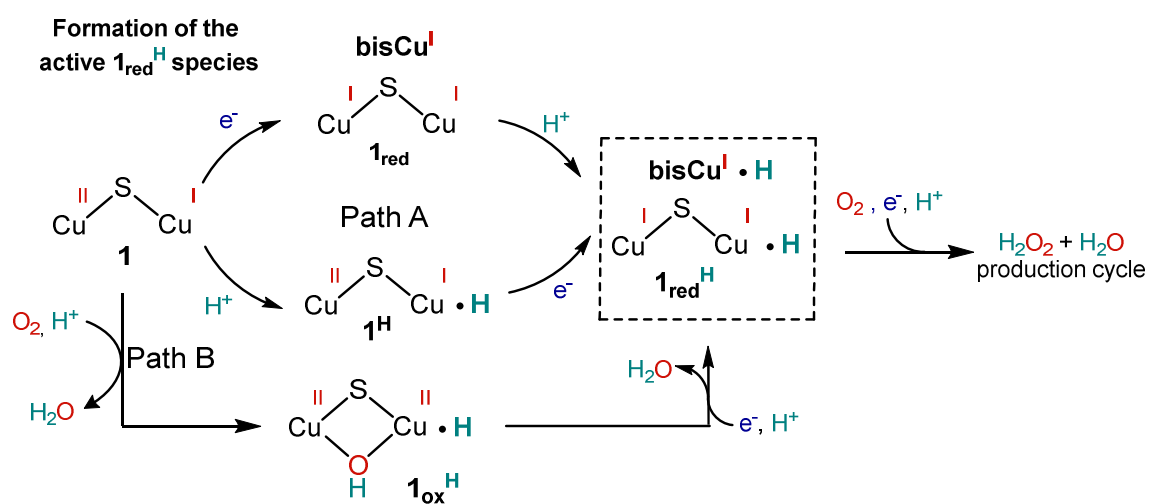

Figure S22. Possible routes for the formation of  $1_{\text{red}}^{\text{H}}$  starting from **1**.



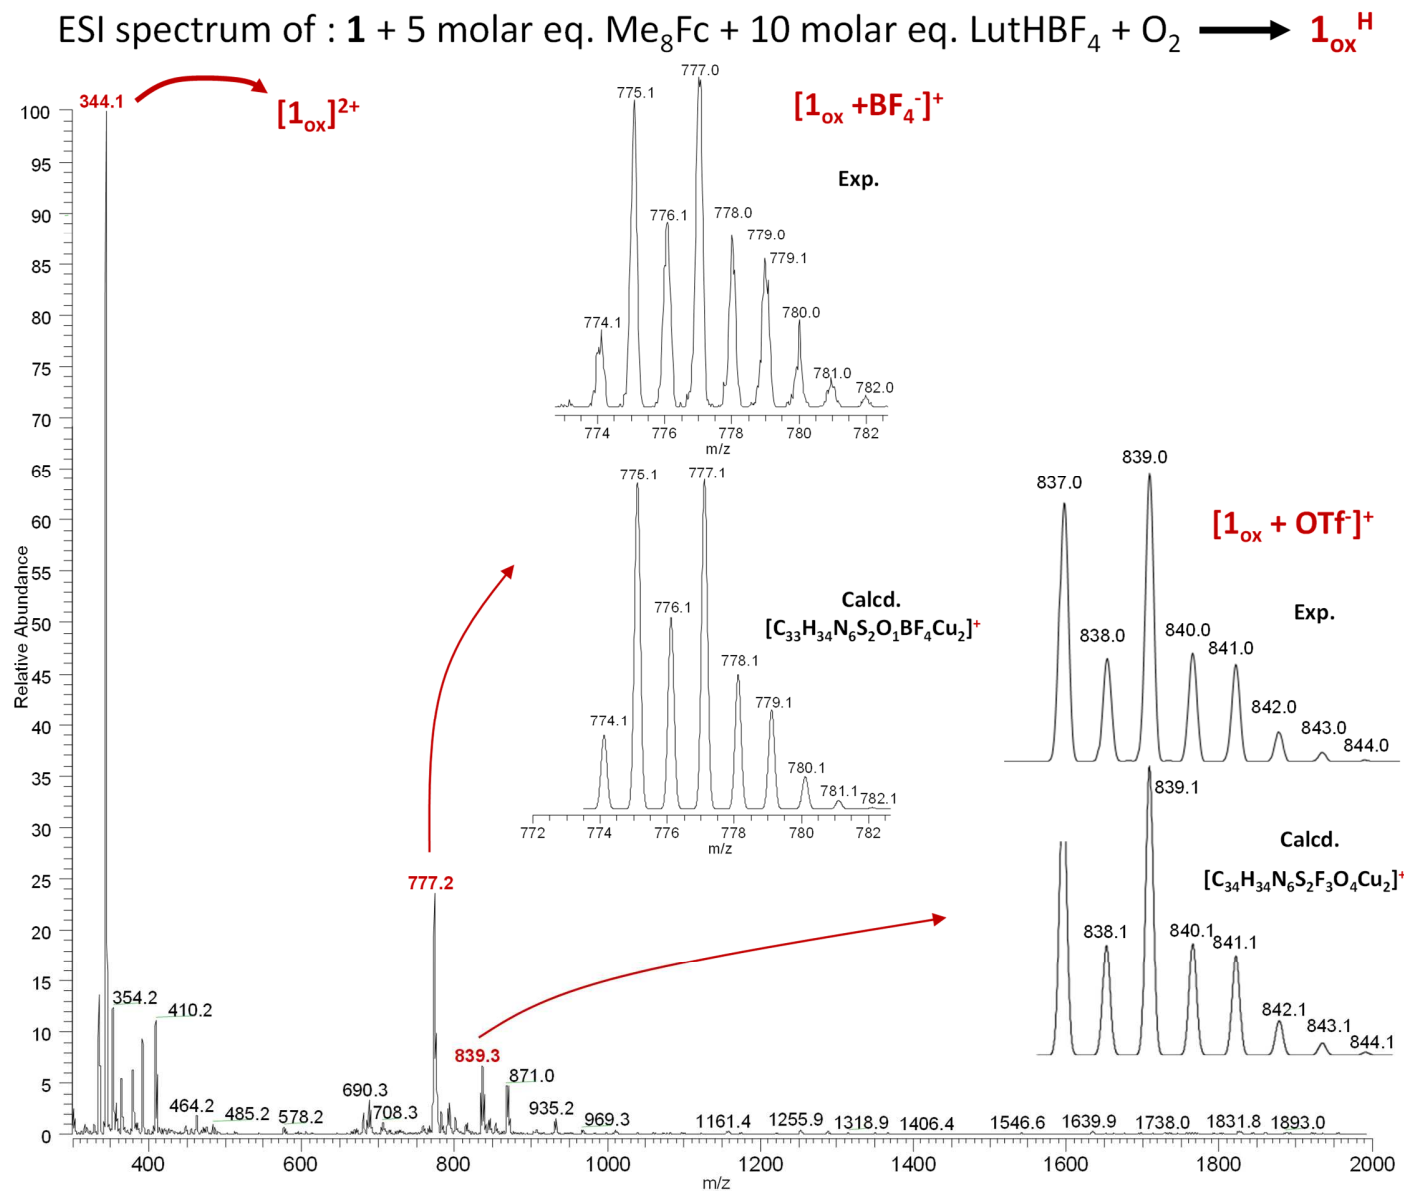

**Figure S23.** Electrospray ionization mass spectrum of the final reaction mixture obtained upon air exposure of a combination of  $\mathbf{1} + \text{LutHBF}_4$  and  $\text{Me}_8\text{Fc}$  in MeCN. Deprotonation processes are likely to occur in the ionization chamber.

**Table S1.** Calculated maximum absorbance values for the tested experimental conditions.<sup>(a)</sup>

|               | Fc <sup>+</sup><br>$\lambda_{\max} = 614 \text{ nm};$<br>$\varepsilon = 410 \text{ M}^{-1} \text{ cm}^{-1}$ | Me <sub>2</sub> Fc <sup>+</sup><br>$\lambda_{\max} = 650 \text{ nm};$<br>$\varepsilon = 290 \text{ M}^{-1} \text{ cm}^{-1}$ | Me <sub>8</sub> Fc <sup>+</sup><br>$\lambda_{\max} = 750 \text{ nm};$<br>$\varepsilon = 390 \text{ M}^{-1} \text{ cm}^{-1}$ | Me <sub>10</sub> Fc <sup>+</sup><br>$\lambda_{\max} = 778 \text{ nm};$<br>$\varepsilon = 495 \text{ M}^{-1} \text{ cm}^{-1}$ |
|---------------|-------------------------------------------------------------------------------------------------------------|-----------------------------------------------------------------------------------------------------------------------------|-----------------------------------------------------------------------------------------------------------------------------|------------------------------------------------------------------------------------------------------------------------------|
| 10 molar eq.  | 0.205                                                                                                       | 0.145                                                                                                                       | 0.195                                                                                                                       | 0.247                                                                                                                        |
| 20 molar eq.  | -(b)                                                                                                        | -(b)                                                                                                                        | 0.390                                                                                                                       | 0.495                                                                                                                        |
| 40 molar eq.  | -(b)                                                                                                        | -(b)                                                                                                                        | 0.780                                                                                                                       | 0.990                                                                                                                        |
| 60 molar eq.  | -(b)                                                                                                        | -(b)                                                                                                                        | 1.170                                                                                                                       | 1.485                                                                                                                        |
| 80 molar eq.  | -(b)                                                                                                        | -(b)                                                                                                                        | 1.560                                                                                                                       | 1.980                                                                                                                        |
| 100 molar eq. | 2.050                                                                                                       | 1.450                                                                                                                       | 1.950                                                                                                                       | 2.475                                                                                                                        |

<sup>(a)</sup>Exp. cond.: [1] = 0.5 mM, V<sub>[1]</sub> = 250 μL, n<sub>1</sub> = 1.25 · 10<sup>-7</sup> mole; n<sub>Me<sub>x</sub>Fc</sub> (x = 0, 2, 8 and 10) = 1.25 · 10<sup>-6</sup>, 2.5 · 10<sup>-6</sup>, 5.0 · 10<sup>-6</sup>, 7.50 · 10<sup>-6</sup>, 10<sup>-5</sup> and 1.25 · 10<sup>-5</sup> mole in 2.225 mL leads to [Me<sub>x</sub>Fc]<sub>initial</sub> = 0.56, 1.12, 2.24, 3.37, 4.49 and 5.6 mM in V<sub>initial</sub> = 2.225 mL. Given V<sub>final</sub> = 2.225 (Me<sub>x</sub>Fc) + 0.250 (1) + 0.025 (LutHBF<sub>4</sub>) = 2.5 mL, the dilution factor is 0.89. This leads to [Me<sub>x</sub>Fc]<sub>final</sub> = 0.50, 1.0, 2.0, 3.0, 4.0 and 5.0 mM used for the calculations; <sup>(b)</sup>Conditions not tested.

**Table S2.** k<sub>obs</sub> (s<sup>-1</sup>) values obtained from mono- (red) or bi-exponential (green) fits of the kinetics traces corresponding to the accumulation of ferrocenium derivatives at the appropriate λ<sub>max</sub>.

|                                                   | 10 molar eq.<br>0.5 mM                                          | 20 molar eq.<br>1.0 mM | 40 molar eq.<br>2.0 mM | 60 molar eq.<br>3.0 mM | 80 molar eq.<br>4.0 mM | 100 molar eq.<br>5.0 mM                                        |
|---------------------------------------------------|-----------------------------------------------------------------|------------------------|------------------------|------------------------|------------------------|----------------------------------------------------------------|
| k <sub>obs</sub> Fc <sup>+</sup>                  | 0.09 ± 0.02<br>4.7 · 10 <sup>-4</sup> ± 0.5 · 10 <sup>-4</sup>  | -(a)                   | -(a)                   | -(a)                   | -(a)                   | 0.09 ± 0.01<br>1.5 · 10 <sup>-3</sup> ± 0.1 · 10 <sup>-3</sup> |
| k <sub>obs</sub> Me <sub>2</sub> Fc <sup>+</sup>  | 0.040 ± 0.01<br>3.3 · 10 <sup>-3</sup> ± 0.4 · 10 <sup>-3</sup> | -(a)                   | -(a)                   | -(a)                   | -(a)                   | 0.04 ± 0.01<br>3.2 · 10 <sup>-3</sup> ± 0.3 · 10 <sup>-3</sup> |
| k <sub>obs</sub> Me <sub>8</sub> Fc <sup>+</sup>  | 1.06 ± 0.02                                                     | 0.61 ± 0.02            | 0.28 ± 0.04            | 0.13 ± 0.01            | 0.15 ± 0.01            | 0.12 ± 0.01                                                    |
| k <sub>obs</sub> Me <sub>10</sub> Fc <sup>+</sup> | 0.47 ± 0.02                                                     | 0.39 ± 0.02            | 0.52 ± 0.03            | 0.62 ± 0.04            | 0.60 ± 0.03            | 0.41 ± 0.02                                                    |

<sup>(a)</sup>: not measured

**Table S3.** Crystal data and structure refinement for **1<sub>ox</sub>**.

|                                      |                                                                                                                            |
|--------------------------------------|----------------------------------------------------------------------------------------------------------------------------|
| <b>Empirical formula</b>             | <b>C<sub>38</sub> H<sub>42</sub> Cl<sub>6</sub> Cu<sub>2</sub> F<sub>6</sub> N<sub>6</sub> O<sub>8</sub> S<sub>3</sub></b> |
| Formula weight                       | 1260.74                                                                                                                    |
| Temperature                          | 150(2) K                                                                                                                   |
| Wavelength                           | 0.71073 Å                                                                                                                  |
| Crystal system                       | Triclinic                                                                                                                  |
| Space group                          | P <sub>-1</sub>                                                                                                            |
| Unit cell dimensions                 | a = 12.9903(4) Å $\alpha$ = 74.072(3)°<br>b = 14.2793(5) Å $\beta$ = 66.275(3)°<br>c = 15.5742(6) Å $\gamma$ = 86.862(3)°  |
| Volume, Z                            | 2538.12(15) Å <sup>3</sup> , 2                                                                                             |
| Density (calculated)                 | 1.650 g/cm <sup>3</sup>                                                                                                    |
| Absorption coefficient               | 1.353 mm <sup>-1</sup>                                                                                                     |
| F(000)                               | 1276                                                                                                                       |
| Crystal size                         | 0.20 x 0.08 x 0.08 mm                                                                                                      |
| $\theta$ range for data collection   | 2.97 to 26.37°                                                                                                             |
| Limiting indices                     | -16<=h<=16, -17<=k<=17, -19<=l<=19                                                                                         |
| Reflections collected                | 34311                                                                                                                      |
| Independent reflections              | 10358 [R(int) = 0.0389]                                                                                                    |
| Absorption correction                | Semi-empirical from equivalents                                                                                            |
| Max. and min. transmission           | 0.8995 and 0.7736                                                                                                          |
| Refinement method                    | Full-matrix least-squares on F <sup>2</sup>                                                                                |
| Data / Restraints / Parameters       | 10358 / 0 / 818                                                                                                            |
| Goodness-of-fit on F <sup>2</sup>    | 0.908                                                                                                                      |
| Final R indices [ $I > 2\sigma(I)$ ] | R1 = 0.0426, wR2 = 0.1043                                                                                                  |
| R indices (all data)                 | R1 = 0.0691, wR2 = 0.1093                                                                                                  |

**Table S4.** Bond length [Å] and angles [deg] for **1<sub>ox</sub>**.

|              |            |              |           |
|--------------|------------|--------------|-----------|
| Cu(1)-Cu(2)  | 2.9238(5)  | C(12)-H(12)  | 0.99(4)   |
| Cu(1)-O(1)   | 1.944(2)   | C(13)-C(14)  | 1.387(7)  |
| Cu(1)-N(4)   | 2.029(3)   | C(13)-H(13)  | 0.80(5)   |
| Cu(1)-N(1)   | 2.082(3)   | C(14)-C(15)  | 1.378(6)  |
| Cu(1)-N(3)   | 2.150(3)   | C(14)-H(14)  | 0.95(4)   |
| Cu(1)-S(1)   | 2.3447(9)  | C(15)-H(15)  | 0.91(3)   |
| Cu(2)-O(1)   | 1.935(2)   | C(16)-C(17)  | 1.496(5)  |
| Cu(2)-N(6)   | 2.014(3)   | C(16)-H(16A) | 0.95(3)   |
| Cu(2)-N(2)   | 2.071(3)   | C(16)-H(16B) | 0.99(3)   |
| Cu(2)-N(5)   | 2.176(3)   | C(17)-C(18)  | 1.382(5)  |
| Cu(2)-S(1)   | 2.3728(10) | C(18)-C(19)  | 1.377(6)  |
| S(1)-C(1)    | 1.775(4)   | C(18)-H(18)  | 0.84(3)   |
| O(1)-H(10)   | 0.78(4)    | C(19)-C(20)  | 1.374(6)  |
| N(1)-C(16)   | 1.471(5)   | C(19)-H(19)  | 0.96(4)   |
| N(1)-C(10)   | 1.499(5)   | C(20)-C(21)  | 1.377(5)  |
| N(1)-C(8)    | 1.514(4)   | C(20)-H(20)  | 0.80(4)   |
| N(2)-C(28)   | 1.476(5)   | C(21)-H(21)  | 0.85(3)   |
| N(2)-C(22)   | 1.497(4)   | C(22)-C(23)  | 1.493(5)  |
| N(2)-C(9)    | 1.504(4)   | C(22)-H(22A) | 0.97(3)   |
| N(3)-C(15)   | 1.335(5)   | C(22)-H(22B) | 0.85(3)   |
| N(3)-C(11)   | 1.351(4)   | C(23)-C(24)  | 1.379(5)  |
| N(4)-C(21)   | 1.327(5)   | C(24)-C(25)  | 1.357(6)  |
| N(4)-C(17)   | 1.345(4)   | C(24)-H(24)  | 0.83(4)   |
| N(5)-C(27)   | 1.332(5)   | C(25)-C(26)  | 1.370(6)  |
| N(5)-C(23)   | 1.346(4)   | C(25)-H(25)  | 0.88(4)   |
| N(6)-C(33)   | 1.342(4)   | C(26)-C(27)  | 1.377(5)  |
| N(6)-C(29)   | 1.350(4)   | C(26)-H(26)  | 0.78(4)   |
| C(1)-C(6)    | 1.390(5)   | C(27)-H(27)  | 0.85(3)   |
| C(1)-C(2)    | 1.394(5)   | C(28)-C(29)  | 1.500(5)  |
| C(2)-C(3)    | 1.391(5)   | C(28)-H(28A) | 0.94(4)   |
| C(2)-C(8)    | 1.522(5)   | C(28)-H(28B) | 0.94(4)   |
| C(3)-C(4)    | 1.385(5)   | C(29)-C(30)  | 1.378(5)  |
| C(3)-H(3)    | 0.83(4)    | C(30)-C(31)  | 1.379(6)  |
| C(4)-C(5)    | 1.375(5)   | C(30)-H(30)  | 0.92(4)   |
| C(4)-C(7)    | 1.508(6)   | C(31)-C(32)  | 1.379(6)  |
| C(5)-C(6)    | 1.396(5)   | C(31)-H(31)  | 0.98(4)   |
| C(5)-H(5)    | 0.89(4)    | C(32)-C(33)  | 1.363(5)  |
| C(6)-C(9)    | 1.509(5)   | C(32)-H(32)  | 0.83(4)   |
| C(7)-H(7A)   | 0.94(5)    | C(33)-H(33)  | 0.85(3)   |
| C(7)-H(7B)   | 1.07(5)    | C(41)-Cl(1)  | 1.764(5)  |
| C(7)-H(7C)   | 0.82(6)    | C(41)-Cl(2)  | 1.782(5)  |
| C(8)-H(8A)   | 0.92(4)    | C(41)-H(41A) | 1.00(4)   |
| C(8)-H(8B)   | 1.01(4)    | C(41)-H(41B) | 0.97(4)   |
| C(9)-H(9A)   | 0.97(3)    | C(42)-Cl(4)  | 1.620(11) |
| C(9)-H(9B)   | 0.86(4)    | C(42)-Cl(3)  | 1.651(9)  |
| C(10)-C(11)  | 1.503(6)   | C(42)-Cl(3B) | 1.743(8)  |
| C(10)-H(10A) | 0.92(3)    | C(42)-Cl(4B) | 1.802(7)  |
| C(10)-H(10B) | 0.90(4)    | C(42)-H(42A) | 0.9900    |
| C(11)-C(12)  | 1.383(5)   | C(42)-H(42B) | 0.9900    |
| C(12)-C(13)  | 1.367(7)   | C(43A)-Cl(5) | 1.699(14) |

|                  |            |                  |           |
|------------------|------------|------------------|-----------|
| C(43A)-Cl(6)     | 1.699(15)  | C(1)-S(1)-Cu(1)  | 99.00(12) |
| C(43A)-H(43A)    | 0.9900     | C(1)-S(1)-Cu(2)  | 97.49(12) |
| C(43A)-H(43B)    | 0.9900     | Cu(1)-S(1)-Cu(2) | 76.60(3)  |
| C(43B)-Cl(5B)    | 1.721(9)   | Cu(2)-O(1)-Cu(1) | 97.82(11) |
| C(43B)-Cl(6B)    | 1.757(11)  | Cu(2)-O(1)-H(10) | 122(3)    |
| C(43B)-H(43C)    | 0.9900     | Cu(1)-O(1)-H(10) | 119(3)    |
| C(43B)-H(43D)    | 0.9900     | C(16)-N(1)-C(10) | 109.6(3)  |
| O(2)-H(1O2)      | 0.90(5)    | C(16)-N(1)-C(8)  | 110.9(3)  |
| O(2)-H(2O2)      | 0.81(5)    | C(10)-N(1)-C(8)  | 109.2(3)  |
| S(2)-O(3S2)      | 1.408(3)   | C(16)-N(1)-Cu(1) | 106.9(2)  |
| S(2)-O(2S2)      | 1.423(3)   | C(10)-N(1)-Cu(1) | 105.8(2)  |
| S(2)-O(1S2)      | 1.443(4)   | C(8)-N(1)-Cu(1)  | 114.3(2)  |
| S(2)-C(2S)       | 1.788(5)   | C(28)-N(2)-C(22) | 108.7(3)  |
| F(1S2)-C(2S)     | 1.284(6)   | C(28)-N(2)-C(9)  | 111.5(3)  |
| F(2S2)-C(2S)     | 1.289(6)   | C(22)-N(2)-C(9)  | 108.8(3)  |
| F(3S2)-C(2S)     | 1.345(8)   | C(28)-N(2)-Cu(2) | 108.4(2)  |
| S(3)-O(3S3)      | 1.383(3)   | C(22)-N(2)-Cu(2) | 105.8(2)  |
| S(3)-O(1S3)      | 1.415(4)   | C(9)-N(2)-Cu(2)  | 113.5(2)  |
| S(3)-O(2S3)      | 1.416(3)   | C(15)-N(3)-C(11) | 118.8(3)  |
| S(3)-C(3S)       | 1.784(5)   | C(15)-N(3)-Cu(1) | 129.1(3)  |
| F(1S3)-C(3S)     | 1.273(6)   | C(11)-N(3)-Cu(1) | 110.6(2)  |
| F(2S3)-C(3S)     | 1.300(6)   | C(21)-N(4)-C(17) | 119.5(3)  |
| F(3S3)-C(3S)     | 1.331(6)   | C(21)-N(4)-Cu(1) | 125.4(2)  |
| O(1)-Cu(1)-N(4)  | 93.48(11)  | C(17)-N(4)-Cu(1) | 114.8(2)  |
| O(1)-Cu(1)-N(1)  | 169.07(12) | C(27)-N(5)-C(23) | 118.3(3)  |
| N(4)-Cu(1)-N(1)  | 80.77(11)  | C(27)-N(5)-Cu(2) | 128.6(2)  |
| O(1)-Cu(1)-N(3)  | 107.82(11) | C(23)-N(5)-Cu(2) | 109.0(2)  |
| N(4)-Cu(1)-N(3)  | 109.40(11) | C(33)-N(6)-C(29) | 118.8(3)  |
| N(1)-Cu(1)-N(3)  | 82.94(11)  | C(33)-N(6)-Cu(2) | 125.0(2)  |
| O(1)-Cu(1)-S(1)  | 85.60(7)   | C(29)-N(6)-Cu(2) | 115.7(2)  |
| N(4)-Cu(1)-S(1)  | 153.31(9)  | C(6)-C(1)-C(2)   | 119.8(3)  |
| N(1)-Cu(1)-S(1)  | 95.36(8)   | C(6)-C(1)-S(1)   | 119.8(3)  |
| N(3)-Cu(1)-S(1)  | 96.17(8)   | C(2)-C(1)-S(1)   | 120.4(3)  |
| O(1)-Cu(1)-Cu(2) | 40.98(7)   | C(3)-C(2)-C(1)   | 118.8(3)  |
| N(4)-Cu(1)-Cu(2) | 112.81(8)  | C(3)-C(2)-C(8)   | 120.5(3)  |
| N(1)-Cu(1)-Cu(2) | 133.32(8)  | C(1)-C(2)-C(8)   | 120.6(3)  |
| N(3)-Cu(1)-Cu(2) | 127.26(8)  | C(4)-C(3)-C(2)   | 122.3(4)  |
| S(1)-Cu(1)-Cu(2) | 52.14(2)   | C(4)-C(3)-H(3)   | 126(3)    |
| O(1)-Cu(2)-N(6)  | 92.96(11)  | C(2)-C(3)-H(3)   | 112(3)    |
| O(1)-Cu(2)-N(2)  | 170.54(11) | C(5)-C(4)-C(3)   | 117.9(4)  |
| N(6)-Cu(2)-N(2)  | 81.41(11)  | C(5)-C(4)-C(7)   | 119.2(4)  |
| O(1)-Cu(2)-N(5)  | 106.90(11) | C(3)-C(4)-C(7)   | 122.9(4)  |
| N(6)-Cu(2)-N(5)  | 114.40(11) | C(4)-C(5)-C(6)   | 121.5(4)  |
| N(2)-Cu(2)-N(5)  | 82.42(11)  | C(4)-C(5)-H(5)   | 116(2)    |
| O(1)-Cu(2)-S(1)  | 85.01(8)   | C(6)-C(5)-H(5)   | 122(2)    |
| N(6)-Cu(2)-S(1)  | 146.95(8)  | C(1)-C(6)-C(5)   | 119.7(3)  |
| N(2)-Cu(2)-S(1)  | 95.55(8)   | C(1)-C(6)-C(9)   | 121.1(3)  |
| N(5)-Cu(2)-S(1)  | 97.60(8)   | C(5)-C(6)-C(9)   | 119.3(3)  |
| O(1)-Cu(2)-Cu(1) | 41.20(7)   | C(4)-C(7)-H(7A)  | 112(3)    |
| N(6)-Cu(2)-Cu(1) | 108.81(7)  | C(4)-C(7)-H(7B)  | 113(2)    |
| N(2)-Cu(2)-Cu(1) | 133.79(8)  | H(7A)-C(7)-H(7B) | 103(4)    |
| N(5)-Cu(2)-Cu(1) | 127.25(8)  | C(4)-C(7)-H(7C)  | 114(5)    |
| S(1)-Cu(2)-Cu(1) | 51.27(2)   | H(7A)-C(7)-H(7C) | 118(5)    |

|                     |           |                     |           |
|---------------------|-----------|---------------------|-----------|
| H(7B)-C(7)-H(7C)    | 96(5)     | N(4)-C(21)-H(21)    | 114(2)    |
| N(1)-C(8)-C(2)      | 113.7(3)  | C(20)-C(21)-H(21)   | 125(2)    |
| N(1)-C(8)-H(8A)     | 109(2)    | C(23)-C(22)-N(2)    | 111.2(3)  |
| C(2)-C(8)-H(8A)     | 109(2)    | C(23)-C(22)-H(22A)  | 113(2)    |
| N(1)-C(8)-H(8B)     | 109(2)    | N(2)-C(22)-H(22A)   | 108.9(19) |
| C(2)-C(8)-H(8B)     | 109(2)    | C(23)-C(22)-H(22B)  | 111(2)    |
| H(8A)-C(8)-H(8B)    | 107(3)    | N(2)-C(22)-H(22B)   | 102(2)    |
| N(2)-C(9)-C(6)      | 113.0(3)  | H(22A)-C(22)-H(22B) | 109(3)    |
| N(2)-C(9)-H(9A)     | 110(2)    | N(5)-C(23)-C(24)    | 121.6(4)  |
| C(6)-C(9)-H(9A)     | 109(2)    | N(5)-C(23)-C(22)    | 115.3(3)  |
| N(2)-C(9)-H(9B)     | 104(2)    | C(24)-C(23)-C(22)   | 123.1(3)  |
| C(6)-C(9)-H(9B)     | 108(2)    | C(25)-C(24)-C(23)   | 119.6(4)  |
| H(9A)-C(9)-H(9B)    | 112(3)    | C(25)-C(24)-H(24)   | 126(3)    |
| N(1)-C(10)-C(11)    | 112.9(3)  | C(23)-C(24)-H(24)   | 114(3)    |
| N(1)-C(10)-H(10A)   | 105(2)    | C(24)-C(25)-C(26)   | 119.2(4)  |
| C(11)-C(10)-H(10A)  | 101(2)    | C(24)-C(25)-H(25)   | 122(3)    |
| N(1)-C(10)-H(10B)   | 109(2)    | C(26)-C(25)-H(25)   | 119(3)    |
| C(11)-C(10)-H(10B)  | 116(3)    | C(25)-C(26)-C(27)   | 118.9(4)  |
| H(10A)-C(10)-H(10B) | 112(3)    | C(25)-C(26)-H(26)   | 130(3)    |
| N(3)-C(11)-C(12)    | 121.1(4)  | C(27)-C(26)-H(26)   | 111(3)    |
| N(3)-C(11)-C(10)    | 115.9(3)  | N(5)-C(27)-C(26)    | 122.4(4)  |
| C(12)-C(11)-C(10)   | 122.9(4)  | N(5)-C(27)-H(27)    | 120(2)    |
| C(13)-C(12)-C(11)   | 119.4(4)  | C(26)-C(27)-H(27)   | 118(2)    |
| C(13)-C(12)-H(12)   | 121(3)    | N(2)-C(28)-C(29)    | 110.2(3)  |
| C(11)-C(12)-H(12)   | 120(3)    | N(2)-C(28)-H(28A)   | 107(2)    |
| C(12)-C(13)-C(14)   | 120.1(4)  | C(29)-C(28)-H(28A)  | 110(2)    |
| C(12)-C(13)-H(13)   | 120(3)    | N(2)-C(28)-H(28B)   | 110(2)    |
| C(14)-C(13)-H(13)   | 119(3)    | C(29)-C(28)-H(28B)  | 114(2)    |
| C(15)-C(14)-C(13)   | 117.5(5)  | H(28A)-C(28)-H(28B) | 105(3)    |
| C(15)-C(14)-H(14)   | 124(3)    | N(6)-C(29)-C(30)    | 121.4(3)  |
| C(13)-C(14)-H(14)   | 118(2)    | N(6)-C(29)-C(28)    | 114.5(3)  |
| N(3)-C(15)-C(14)    | 123.2(4)  | C(30)-C(29)-C(28)   | 124.1(3)  |
| N(3)-C(15)-H(15)    | 116(2)    | C(29)-C(30)-C(31)   | 119.3(4)  |
| C(14)-C(15)-H(15)   | 121(2)    | C(29)-C(30)-H(30)   | 114(2)    |
| N(1)-C(16)-C(17)    | 109.7(3)  | C(31)-C(30)-H(30)   | 127(2)    |
| N(1)-C(16)-H(16A)   | 113(2)    | C(32)-C(31)-C(30)   | 118.9(4)  |
| C(17)-C(16)-H(16A)  | 107(2)    | C(32)-C(31)-H(31)   | 117(2)    |
| N(1)-C(16)-H(16B)   | 111(2)    | C(30)-C(31)-H(31)   | 124(2)    |
| C(17)-C(16)-H(16B)  | 110.4(19) | C(33)-C(32)-C(31)   | 119.3(4)  |
| H(16A)-C(16)-H(16B) | 106(3)    | C(33)-C(32)-H(32)   | 119(3)    |
| N(4)-C(17)-C(18)    | 121.4(3)  | C(31)-C(32)-H(32)   | 121(3)    |
| N(4)-C(17)-C(16)    | 114.8(3)  | N(6)-C(33)-C(32)    | 122.3(4)  |
| C(18)-C(17)-C(16)   | 123.8(3)  | N(6)-C(33)-H(33)    | 114(2)    |
| C(19)-C(18)-C(17)   | 119.1(4)  | C(32)-C(33)-H(33)   | 124(2)    |
| C(19)-C(18)-H(18)   | 122(2)    | Cl(1)-C(41)-Cl(2)   | 110.5(3)  |
| C(17)-C(18)-H(18)   | 118(2)    | Cl(1)-C(41)-H(41A)  | 102(2)    |
| C(20)-C(19)-C(18)   | 118.8(4)  | Cl(2)-C(41)-H(41A)  | 111(2)    |
| C(20)-C(19)-H(19)   | 124(2)    | Cl(1)-C(41)-H(41B)  | 107(3)    |
| C(18)-C(19)-H(19)   | 117(2)    | Cl(2)-C(41)-H(41B)  | 103(3)    |
| C(19)-C(20)-C(21)   | 119.5(4)  | H(41A)-C(41)-H(41B) | 123(3)    |
| C(19)-C(20)-H(20)   | 128(3)    | Cl(4)-C(42)-Cl(3)   | 118.3(6)  |
| C(21)-C(20)-H(20)   | 112(3)    | Cl(4)-C(42)-Cl(3B)  | 91.4(7)   |
| N(4)-C(21)-C(20)    | 121.7(4)  | Cl(3)-C(42)-Cl(3B)  | 27.6(5)   |

|                      |           |                     |          |
|----------------------|-----------|---------------------|----------|
| Cl(4)-C(42)-Cl(4B)   | 14.5(7)   | O(3S2)-S(2)-O(2S2)  | 116.8(2) |
| Cl(3)-C(42)-Cl(4B)   | 132.4(7)  | O(3S2)-S(2)-O(1S2)  | 114.9(2) |
| Cl(3B)-C(42)-Cl(4B)  | 105.9(4)  | O(2S2)-S(2)-O(1S2)  | 112.2(2) |
| Cl(4)-C(42)-H(42A)   | 107.7     | O(3S2)-S(2)-C(2S)   | 105.0(2) |
| Cl(3)-C(42)-H(42A)   | 107.7     | O(2S2)-S(2)-C(2S)   | 103.7(2) |
| Cl(3B)-C(42)-H(42A)  | 113.9     | O(1S2)-S(2)-C(2S)   | 102.1(3) |
| Cl(4B)-C(42)-H(42A)  | 102.1     | F(1S2)-C(2S)-F(2S2) | 109.1(6) |
| Cl(4)-C(42)-H(42B)   | 107.7     | F(1S2)-C(2S)-F(3S2) | 106.7(5) |
| Cl(3)-C(42)-H(42B)   | 107.7     | F(2S2)-C(2S)-F(3S2) | 103.1(5) |
| Cl(3B)-C(42)-H(42B)  | 126.3     | F(1S2)-C(2S)-S(2)   | 114.6(4) |
| Cl(4B)-C(42)-H(42B)  | 97.5      | F(2S2)-C(2S)-S(2)   | 113.5(4) |
| H(42A)-C(42)-H(42B)  | 107.1     | F(3S2)-C(2S)-S(2)   | 108.8(5) |
| Cl(5)-C(43A)-Cl(6)   | 117.3(10) | O(3S3)-S(3)-O(1S3)  | 112.9(4) |
| Cl(5)-C(43A)-H(43A)  | 108.0     | O(3S3)-S(3)-O(2S3)  | 118.0(3) |
| Cl(6)-C(43A)-H(43A)  | 108.0     | O(1S3)-S(3)-O(2S3)  | 112.4(2) |
| Cl(5)-C(43A)-H(43B)  | 108.0     | O(3S3)-S(3)-C(3S)   | 104.6(3) |
| Cl(6)-C(43A)-H(43B)  | 108.0     | O(1S3)-S(3)-C(3S)   | 101.3(3) |
| H(43A)-C(43A)-H(43B) | 107.2     | O(2S3)-S(3)-C(3S)   | 105.6(2) |
| Cl(5B)-C(43B)-Cl(6B) | 112.2(6)  | F(1S3)-C(3S)-F(2S3) | 113.9(5) |
| Cl(5B)-C(43B)-H(43C) | 109.2     | F(1S3)-C(3S)-F(3S3) | 102.6(5) |
| Cl(6B)-C(43B)-H(43C) | 109.2     | F(2S3)-C(3S)-F(3S3) | 105.2(4) |
| Cl(5B)-C(43B)-H(43D) | 109.2     | F(1S3)-C(3S)-S(3)   | 112.0(4) |
| Cl(6B)-C(43B)-H(43D) | 109.2     | F(2S3)-C(3S)-S(3)   | 113.0(3) |
| H(43C)-C(43B)-H(43D) | 107.9     | F(3S3)-C(3S)-S(3)   | 109.4(4) |
| H(1O2)-O(2)-H(2O2)   | 100(4)    |                     |          |

## References.

- [1] S. Torelli, M. Orio, J. Pécaut, H. Jamet, L. Le Pape, S. Ménage, *Angew. Chem. Int. Ed.* **2010**, *49*, 8249-8252.
- [2] (a) M. Roemer, B. W. Skelton, M. J. Piggott, G. A. Koutsantonis, *Dalton Trans.* **2016**, *45*, 18817-18821; (b) H. Ohmori, T. Takanami, H. Shimada, M. Masui, *Chem. Pharm. Bull.* **1987**, *35*, 2558-2560; (c) C. L. Ford, Y. J. Park, E. M. Matson, Z. Gordon, A. R. Fout, *Science* **2016**, *354*, 741-743.
- [3] (a) N. V. Klassen, D. Marchington, H. C. E. McGowan, *Anal. Chem.* **1994**, *66*, 2921-2925; (b) C. Matsubara, N. Kawamoto, K. Takamura, *Analyst* **1992**, *117*, 1781-1784.
